# Supplementary material for: Black hole information turbulence and the Hubble tension
Source: Research Square preprint supplement (doi:10.21203/rs.3.rs-6727087/v1), 2025-08-05
Supplement: Supplementary file 10 [file SuppInf_SciRepCosmos2.pdf › SuppInfAmend2/SuppInf_SciRepCosmos2.pdf]

# Supplementary Information for “Black hole information turbulence and the Hubble tension”

Juan Luis Cabrera Fernández<sup>1,2,\*</sup>

<sup>1</sup>Departamento de Física Aplicada, ETSI Aeronáutica y del Espacio, Universidad Politécnica de Madrid, Pza. Cardenal Cisneros 3, 28040, Madrid, Spain.

<sup>2</sup>Laboratorio de Dinámica Estocástica, Centro de Física, Instituto Venezolano de Investigaciones Científicas, Caracas 1020-A, Venezuela.

\*juanluis.cabrera[at]upm.es

## ABSTRACT

This is the Supplementary Information file for the article “Black hole information turbulence and the Hubble tension”.

### An illustrative example of the leading term at generation $\tau = 3$ of the eigenvalues governing the dynamics of the population of qubits

The leading term at generation  $\tau = 3$  is called here  $\Lambda_3$ . We can grasp how the eigenvalues behave by observing the way the term  $\Lambda_3$  is assembled (see<sup>1</sup> for the meaning of  $\alpha$  and  $\beta$ ),

$$\Lambda_3 \equiv \left\{ \begin{array}{l} \left[ \begin{array}{l} (1 + \beta^2 \alpha^2) r_1^2 \\ + (\beta^2 + \beta^4 \alpha^2) \end{array} \right] r_2^2 \\ + \left[ \begin{array}{l} (-2\alpha\beta^2 - 2\beta^4\alpha^3) r_1^2 \\ + (\beta^4\alpha^2 + \beta^6\alpha^4) r_1^2 \end{array} \right] r_2 \end{array} \right\} r_3^2 \quad (1)$$

$$+ \left\{ \begin{array}{l} \left[ \begin{array}{l} (-2\alpha\beta^2) r_1^2 \\ + (-2\alpha\beta^4) \end{array} \right] r_2^2 \\ + \left[ \begin{array}{l} (2\alpha^2\beta^4) r_1^2 \end{array} \right] r_2 \end{array} \right\} r_3$$

$$+ \left\{ \begin{array}{l} \left[ \begin{array}{l} (\beta^4\alpha^2) r_1^2 \\ + (\alpha^2\beta^6) \end{array} \right] r_2^2 \end{array} \right\}$$

The nested coefficients structures a cascade as illustrated in the main text Fig. 1. Given the initial coefficient values for the second order term:  $C_2 = 1 + \beta^2 \alpha^2$ , the linear term:  $C_1 = 0$ , and the independent term:  $C_0 = \beta^2$ ; the generation rule allow us to calculate the coefficients that will form the leading term of the eigenvalues at the next iteration  $\tau = 2$ , shown in the second row of the main text Fig. 1. Now, this new set of coefficients allows for the calculation of the nested coefficients of the leading term of the eigenvalues at the iteration  $\tau = 3$  (third row at the same figure); a full cascade is generated by iteratively applying the generation rule. On each iteration  $\tau$ ,  $3^\tau$  new terms are generated.

### The generation rule

The coefficients of higher order values of the leading term can be precisely obtained from the preceding terms by the following generation rule. In general, if we know  $\Lambda_1$  and  $\Lambda_2$ , we can obtain  $\Lambda_\tau$  given that, in the generation  $\tau - 1$ , the term  $\{C_2 r_i^2 + C_1 r_i + C_0\} r_{i+1}^k$ , with  $k = 0, 1, 2$ ; generates the polynomial

$$\left\{ \begin{array}{l} [C_2 r_i^2 + C_1 \chi_1 r_i + \beta^2 C_2] r_{i+1}^2 \\ + [-k\alpha\beta^2 C_2 r_i^2 + C_1 \chi_2 r_i + C_1 \chi_3] r_{i+1} \\ + [\beta^2 \alpha^2 C_0 r_i^2 + C_1 \chi_4 r_i + C_1 \chi_5] \end{array} \right\} r_{i+2}^k, \quad (2)$$

in the next generation  $\tau$ . There is no need to determine the unknowns,  $\chi_1, \chi_2, \dots, \chi_5$ , because in the current situation  $C_1 = 0$  (see details in<sup>1</sup>).

## 28 Fractal construction

29 The structure of the  $\Lambda_\tau$ 's is better represented by the induced fractal it generates: to the initial coefficient values  $C_2$ ,  
 30  $C_1$  and  $C_0$ , same size segments on the unit interval are assigned. After repeated iterations each subset is divided  
 31 by a factor of 3, and the newly generated coefficients obtained with the generation rule updates the new  $N_\tau = 3^\tau$   
 32 subintervals. A detailed account of the process is available at<sup>1</sup>.

## 33 Fitting the cascade's components

Figure 3 shows the number of coloured  $n_C$  and lacunar  $n_L$  components in the inverted cascade. Both quantities grow exponentially following fits:

$$n_C(\tau) \sim 0.812 e^{0.807 \tau} \quad (3)$$

$$n_L(\tau) \sim 0.561 e^{1.142 \tau} \quad (4)$$

34 One may try to fit the fraction of the cascade coloured,  $N_C$ , and lacunar,  $N_L$ , components with the equations describing  
 35 the fractional energy density of nonrelativistic matter and dark energy. Such a fitting is exemplified by the arbitrary  
 36 selection of the following models:

- The consensus cold dark matter model ( $\Lambda$ CDM) :

$$N_L(\tau) = \frac{p_m(1+C_z\tau)^3}{p_r(1+C_z\tau)^4 + p_m(1+C_z\tau)^3 + p_k(1+C_z\tau)^2 + (1-p_k-p_m-p_r)} \quad (5)$$

- The constant  $w$  model ( $w$ CDM) :

$$N_L(\tau) = \frac{p_m(1+C_z\tau)^3}{p_r(1+C_z\tau)^4 + p_m(1+C_z\tau)^3 + p_k(1+C_z\tau)^2 + (1-p_k-p_m-p_r)(1+C_z\tau)^\omega} \quad (6)$$

- The Chevallier–Polarski–Linder model (CPL):

$$N_L(\tau) = \frac{p_m(1+C_z\tau)^3}{p_r(1+C_z\tau)^4 + p_m(1+C_z\tau)^3 + p_k(1+C_z\tau)^2 + (1-p_k-p_m-p_r)(1+C_z\tau)^{3(1+\omega_0+\omega_a)} e^{\frac{-3\omega_a C_z \tau}{1+C_z \tau}}} \quad (7)$$

- The generalised Chaplygin gas model (GCG):

$$N_L(\tau) = \frac{p_m(1+C_z\tau)^3}{p_r(1+C_z\tau)^4 + p_b(1+C_z\tau)^3 + p_k(1+C_z\tau)^2 + (1-p_k-p_b-p_r)[(A_s + (1-A_s)(1+C_z\tau)^{3(1+\alpha)})^{\frac{1}{1+\alpha}}]} \quad (8)$$

- The interacting dark energy model (IDE):

$$N_L(\tau) = \frac{p_m(1+C_z\tau)^3}{p_r(1+C_z\tau)^4 + p_k(1+C_z\tau)^2 + (1-p_k-p_m-p_r)(1+C_z\tau)^{3(1+\omega_x)} + \frac{b_m}{\delta+3\omega_x}[\delta(1+C_\tau)^{3(1+\omega_x)} + 3\omega_x(1+C_z\tau)^{3-\delta}]} \quad (9)$$

- Early dark energy model (EDE)

$$N_L(\tau) = \frac{p_m(1+C_z\tau)^3(1-\Omega_{DE}(z))}{p_r(1+C_z\tau)^4 + p_m(1+C_z\tau)^3 + p_k(1+C_z\tau)^2} \quad (10)$$

$$\begin{aligned} \Omega_{DE}(z) \equiv & ((1.0 - p_k - p_m - p_r) - w_e(1 - (1 + C_z\tau)^{3w_0})) \\ & \times [(1.0 - p_k - p_m - p_r) + p_k(1 + C_z\tau)^{-3w_0-1} \\ & + p_m(1 + C_z\tau)^{-3w_0} + p_r(1 + C_z\tau)^{-3w_0+1}]^{-1} \\ & + w_e(1 - (1 + C_z\tau)^{3w_0}). \end{aligned} \quad (11)$$

- Poulin *et al.* Early Dark Model (EDEP)

$$N_L(\tau) = \frac{p_m(1 + C_z\tau)^3}{p_r(1 + C_z\tau)^4 + p_m(1 + C_z\tau)^3 + p_k(1 + C_z\tau)^2 + (1.0 - p_k - p_m - p_r) + \frac{2p_a}{\left(\frac{1 + Z^c}{1 + C_z\tau}\right)^{3(w_n+1)} + 1}} \quad (12)$$

and  $N_C(\tau) = 1 - N_L(\tau)$  for all the cases.

With the exception of  $\Omega_{DE}(\tau)$  - being a function - we avoided the conventional use of the sign for the energy densities ( $\Omega_x$ ) as - at this point in our discourse -, the fitting parameters have no physical meaning. Even so, we have kept the same subscripts to maintain a certain parallelism with the original meaning, i.e., we deal with parameters  $p_k, p_m, p_r$  in the  $\Lambda$ CDM model. The  $w$ CDM adds the parameter  $w$ , the CPL, GCG, IDE and EDE models include the additional parameter sets  $(\omega_0, \omega_a)$ ,  $(A_s, \alpha)$ ,  $(\omega_x, \delta)$  and  $(\omega_0, \Omega_e)$ , respectively, while the EDEP includes the parameters  $(p_a, w_n, Z^c)$ . Used models where inspired by<sup>3</sup> where all of them included a contribution from curvature. In particular, the EDE model is based on<sup>4,5</sup>. However the EDEP model was assembled using equations (5) and (15) in<sup>6</sup> and, for fitting purposes, we decided to took the previous triple as parameters. We incorporated the additional parameter  $C_z$  which intents to fit the relationship between the iteration step  $\tau$  and the cosmological redshift  $z$ . Best fit parameters using the Turing.jl package for Bayesian inference with the No-U-Turn sampler<sup>7</sup> are summarised in Table 1 and the corner plots for the parameters and their covariance are shown in Figs. 3-8. No corner plot for the GCG model are included as our fitting results were quite unsatisfactory. With the exception of GCG all the models yielded a  $\sigma^2$  measure of the order of  $\sim 10^{-4}$  with  $w$ CDM reaching a best value of  $\sim 10^{-5}$ . For all the models  $p_\Lambda \sim 0.8$  and  $p_m$  is in the range  $\sim 0.14 - 0.18$ . While GCG differs substantially, most models produced  $p_k \sim 0.00027$ , excepting EDE with  $p_k \sim 0.005726$  and EDEP with the only slightly negative value  $p_k \sim -0.001418$  (positive in the error margin, reported in the Fig. 8.). Meanwhile,  $w$ CDM, CPL, GCG and IDE reported  $p_r$  negative values in the range  $\sim [-5.8, -0.2] \times 10^{-3}$ , while  $\Lambda$ CDM, EDE and EDEP models have positive  $p_r \sim 0.000137, 0.000209$  and  $0.000148$  (whose  $\sigma^2$  were  $0.000228, 0.000181$  and  $0.000226$ , respectively). The obtained values for the parameter pairs  $(\omega_0, \omega_a)$ ,  $(A_s, \alpha)$  and  $(\omega_x, \delta)$  in the CPL, GCG and IDE models are very close to those obtained in<sup>3</sup> - i.e.,  $(-0.966, 0.202)$ ,  $(0.733, -0.011)$  and  $(-1.001, -0.0043)$ , respectively -<sup>1</sup>. Given that the only models yielding positive values for  $p_r$  are the  $\Lambda$ CDM, EDE and EDEP models we conclude these are the ones best fitting the  $N_L$  data. Remarkably, the best values obtained for the parameter  $C_z$  for these models are quite close to each other:  $0.365496, 0.389605$  and  $0.361704$ . Thus, the relationship between iteration steps and the redshift may be written as  $z \sim C_z\tau$ . Plots with the fitting results for the  $\Lambda$ CDM,  $w$ CDM, CPL, IDE, EDE and EDEP models are shown in the Fig. 13.

### $E(z)$ used in the calculations of the Hubble constant

The analysis was restricted to the best behavior models from the above section, i.e.,  $E(\tau)$ ,

- for the  $\Lambda$ CDM model is given by,

$$E(\tau) = p_r(1 + C_z\tau)^4 + p_m(1 + C_z\tau)^3 + p_k(1 + C_z\tau)^2 + (1 - p_k - p_m - p_r), \quad (13)$$

- for the EDE model is given by,

$$E(\tau) = \frac{p_r(1 + C_z\tau)^4 + p_m(1 + C_z\tau)^3 + p_k(1 + C_z\tau)^2}{1 - \Omega_{DE}(\tau)}, \quad (14)$$

with  $\Omega_{DE}(\tau)$  expressed by eq. (11), and

<sup>13</sup> makes use of data from the Union2.1 SNe compilation and the WiggleZ BAO measurements, together with the WMAP 7-yr distance priors and the observational Hubble data.

- for the EDEP model is given by,

$$E(\tau) = p_r(1 + C_z\tau)^4 + p_m(1 + C_z\tau)^3 + p_k(1 + \tau)^2 + (1.0 - p_k - p_m - p_r) + \frac{2p_a}{\left(\frac{1 + Z^c}{1 + C_z\tau}\right)^{3(w_n+1)} + 1}. \quad (15)$$

The parameter values in these models are those given in Table 1.

## $H_0$ error determination

Native Interpolations.jl doesn't provide built-in confidence intervals. To calculate an error estimation for  $H_0$  we took the mean value of the propagated error of the equation (28) in the main text, i.e.,

$$\varepsilon(H_0) \sim \langle \varepsilon(\Upsilon_x) \rangle = \frac{1}{2} \frac{\varepsilon(p_h)}{p_h} + \frac{1}{2} \left\langle \frac{\varepsilon(\mathcal{M}_x)}{\mathcal{M}_x} \right\rangle. \quad (16)$$

In this expression  $\varepsilon(\mathcal{M}_x)$  is the root mean square deviation, i.e.  $\varepsilon(\mathcal{M}_x) \equiv \sqrt{\left\langle \left( \frac{\Delta D_x}{D_x} - \mathcal{M}_x^{1/2} \right)^2 \right\rangle}$ . Note that

$\varepsilon\left(\frac{\Delta D_x}{D_x}\right) = 0$ , as the involved quantities were measured directly on the fractal.

| Parameter   | ΛCDM     | wCDM      | CPL       | GCG                 | IDE       | EDE       | EDEP      |
|-------------|----------|-----------|-----------|---------------------|-----------|-----------|-----------|
| $C_z$       | 0.366038 | 0.728667  | 0.423091  | 0.917701            | 0.528297  | 0.389605  | 0.361704  |
| $p_k$       | 0.000268 | 0.00027   | 0.00027   | 0.334792            | 0.00027   | 0.005726  | -0.001418 |
| $p_m$       | 0.177603 | 0.141675  | 0.164878  | $p_b \equiv 0.0451$ | 0.163759  | 0.179941  | 0.180455  |
| $p_r$       | 0.000137 | -0.000225 | -0.00035  | -0.005757           | -0.000459 | 0.000209  | 0.000148  |
| $p_\Lambda$ | 0.821993 | 0.85828   | 0.835201  | 0.77703             | 0.821993  | 0.814124  | 0.820815  |
| $p_5$       | —        | 0.821767  | -1.006021 | 0.747408            | -0.822978 | -0.953692 | 0.219839  |
| $p_6$       | —        | —         | 0.205858  | -0.011034           | -0.00453  | 0.814125  | 0.565335  |
| $p_7$       | —        | —         | —         | —                   | —         | —         | $10^6$    |
| $\sigma^2$  | 0.000228 | 0.000097  | 0.000126  | 0.432337            | 0.000134  | 0.000181  | 0.000226  |

**Table 1. Best fit parameters obtained using Julia's Turing.jl Bayesian inference.** Here  $p_\Lambda \equiv 1 - p_k - p_m - p_r$ ;  $p_5 = w$  in the wCDM,  $(p_5, p_6)$  are  $(\omega_0, \omega_a)$ ,  $(A_s, \alpha)$ ,  $(\omega_x, \delta)$  and  $(\omega_0, \Omega_e)$  in the CPL, GCG, IDE and EDE models, respectively; the EDEP model extra parameters are  $(p_5, p_6, p_7) = (p_a, w_n, Z^c)$ ;  $\sigma^2$  means residuals. In the GCG model  $p_m$  was substituted by the present density parameter of baryonic matter  $p_b = \Omega_b = 0.0451$ , according to the WMAP 7yr results<sup>9</sup> following the example in<sup>3</sup>.

| Model         | $D_x$    | $p_h$              | $p_e$           | $H_0$                              |
|---------------|----------|--------------------|-----------------|------------------------------------|
| $\Lambda$ CDM | $D_{cg}$ | $116.11 \pm 20.21$ | $1.54 \pm 0.03$ | <b><math>62.79 \pm 5.48</math></b> |
| $\Lambda$ CDM | $D_m$    | $74.00 \pm 0.00$   | $1.41 \pm 0.00$ | <b><math>70.07 \pm 0.09</math></b> |
| EDE           | $D_{cg}$ | $127.87 \pm 2.87$  | $1.50 \pm 0.04$ | $78.91 \pm 0.91$                   |
| EDE           | $D_m$    | $35.69 \pm 1.23$   | $1.50 \pm 0.01$ | $37.57 \pm 0.69$                   |
| EDEP          | $D_{cg}$ | $134.60 \pm 9.99$  | $1.52 \pm 0.01$ | $73.55 \pm 2.75$                   |
| EDEP          | $D_m$    | $39.81 \pm 1.08$   | $1.51 \pm 0.00$ | $36.91 \pm 0.53$                   |

**Table 2. Best fitted parameters for models given by the equation (21).** Bayesian inference with a Markov Chain Monte Carlo and 300000 priors.  $H_0$  was obtained from the estimate posterior distributions according to equations (28) and (29). Zero errors means they are smaller than  $10^{-2}$ . Results for  $H_0$  are in units of  $H(\tau)$ , i.e. in Km/s/Mpc, as expected.

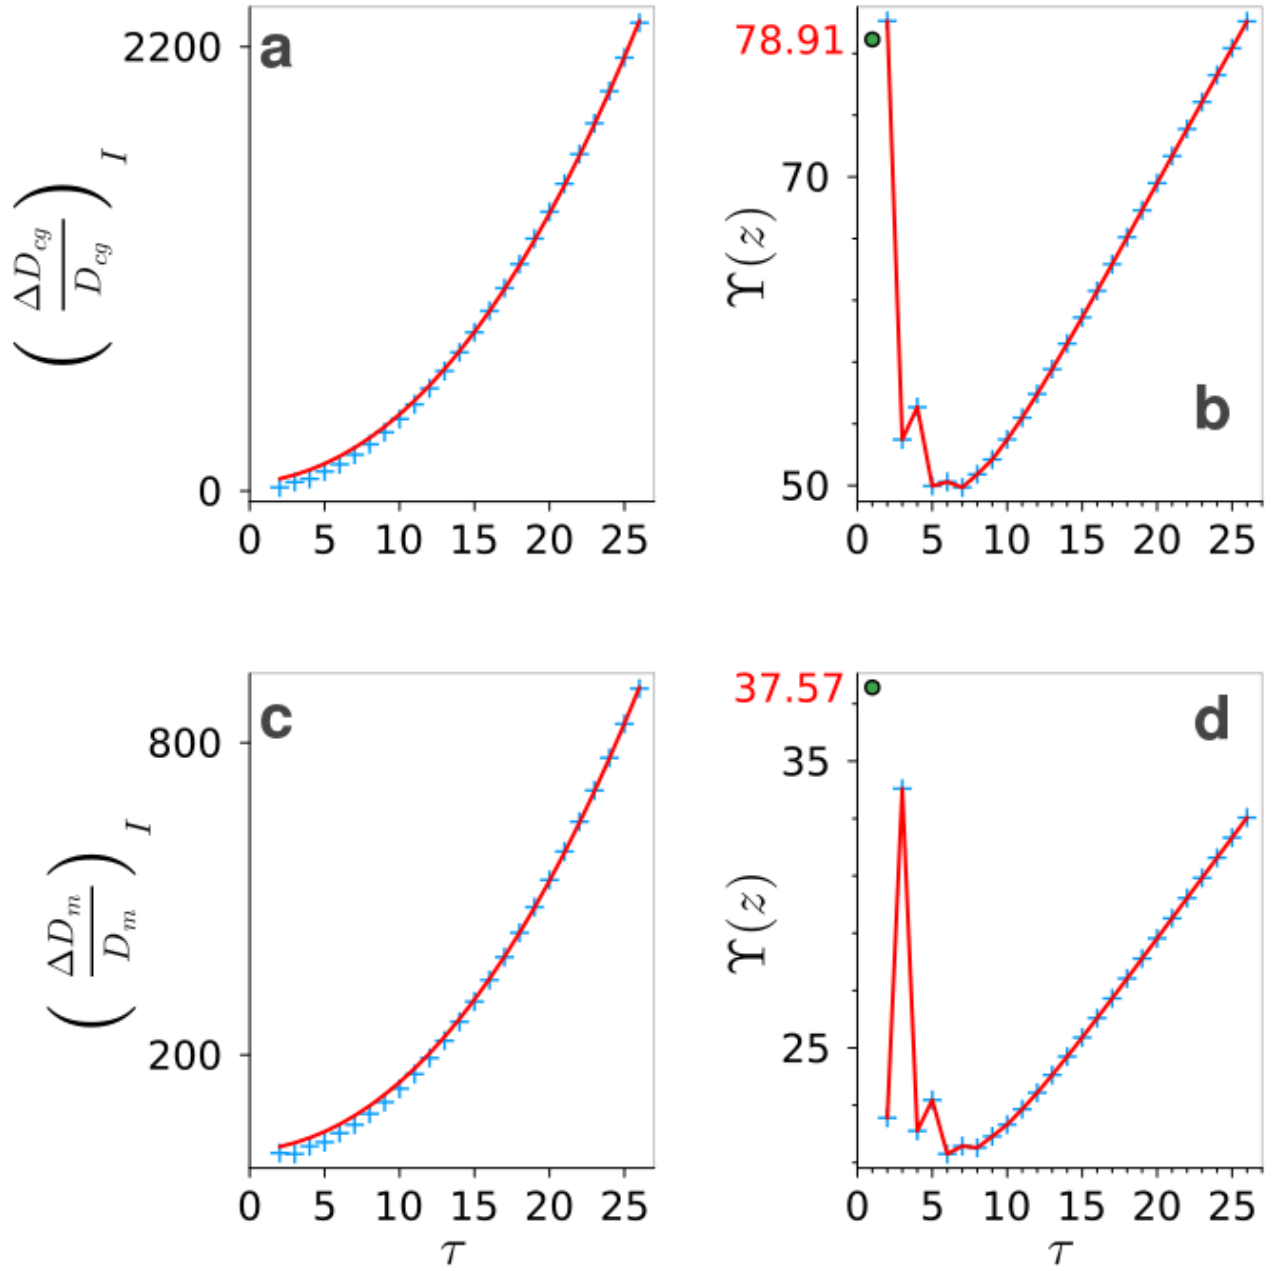

**Figure 1. Determination of the Hubble constant from the relative growth of the fractal space.** Same as in the main text Fig. 7, but using EDE  $E(t)$ , i.e., given by the SI equation 14. In this case **b**  $H_0 = \Upsilon(1) \sim (78.91 \pm 0.91)$  Km/s/Mpc and **d**  $H_0 = \Upsilon(1) \sim (37.57 \pm 0.69)$  Km/s/Mpc.

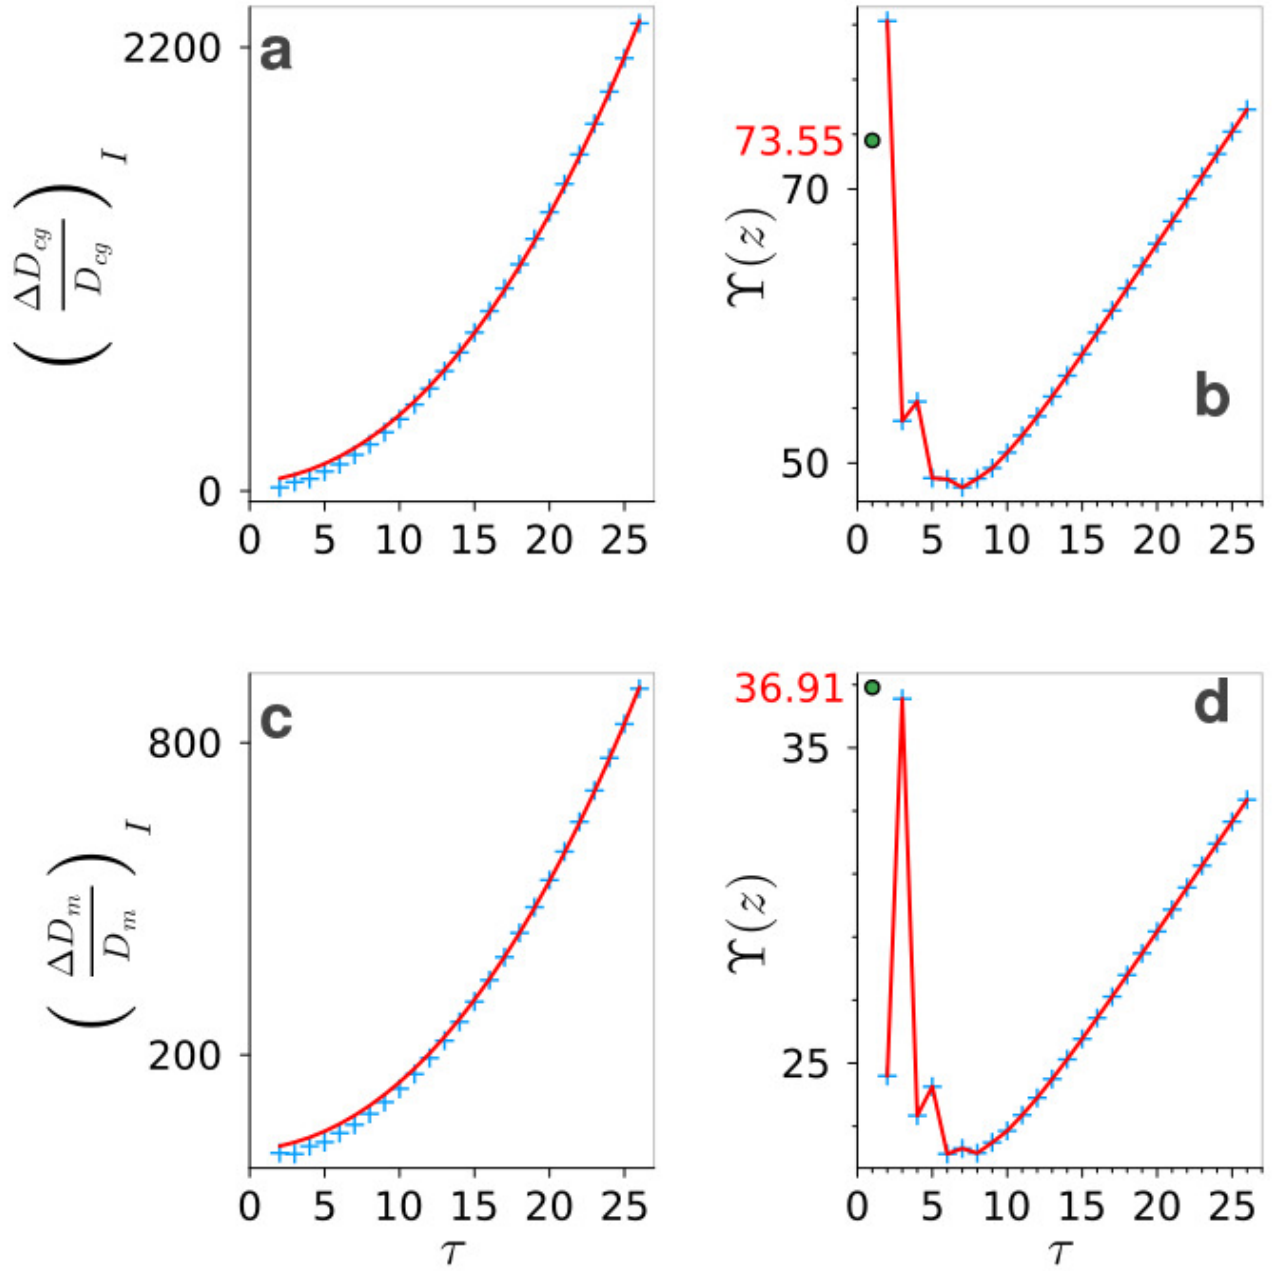

**Figure 2. Determination of the Hubble constant from the relative growth of the fractal space.** Same as in the main text Fig. 7, but using EDEP  $E(t)$ , i.e., given by the SI equation 15. In this case **b**  $H_0 = \Upsilon(1) \sim (73.55 \pm 2.75)$  Km/s/Mpc and **d**  $H_0 = \Upsilon(1) \sim (36.91 \pm 0.53)$  Km/s/Mpc.

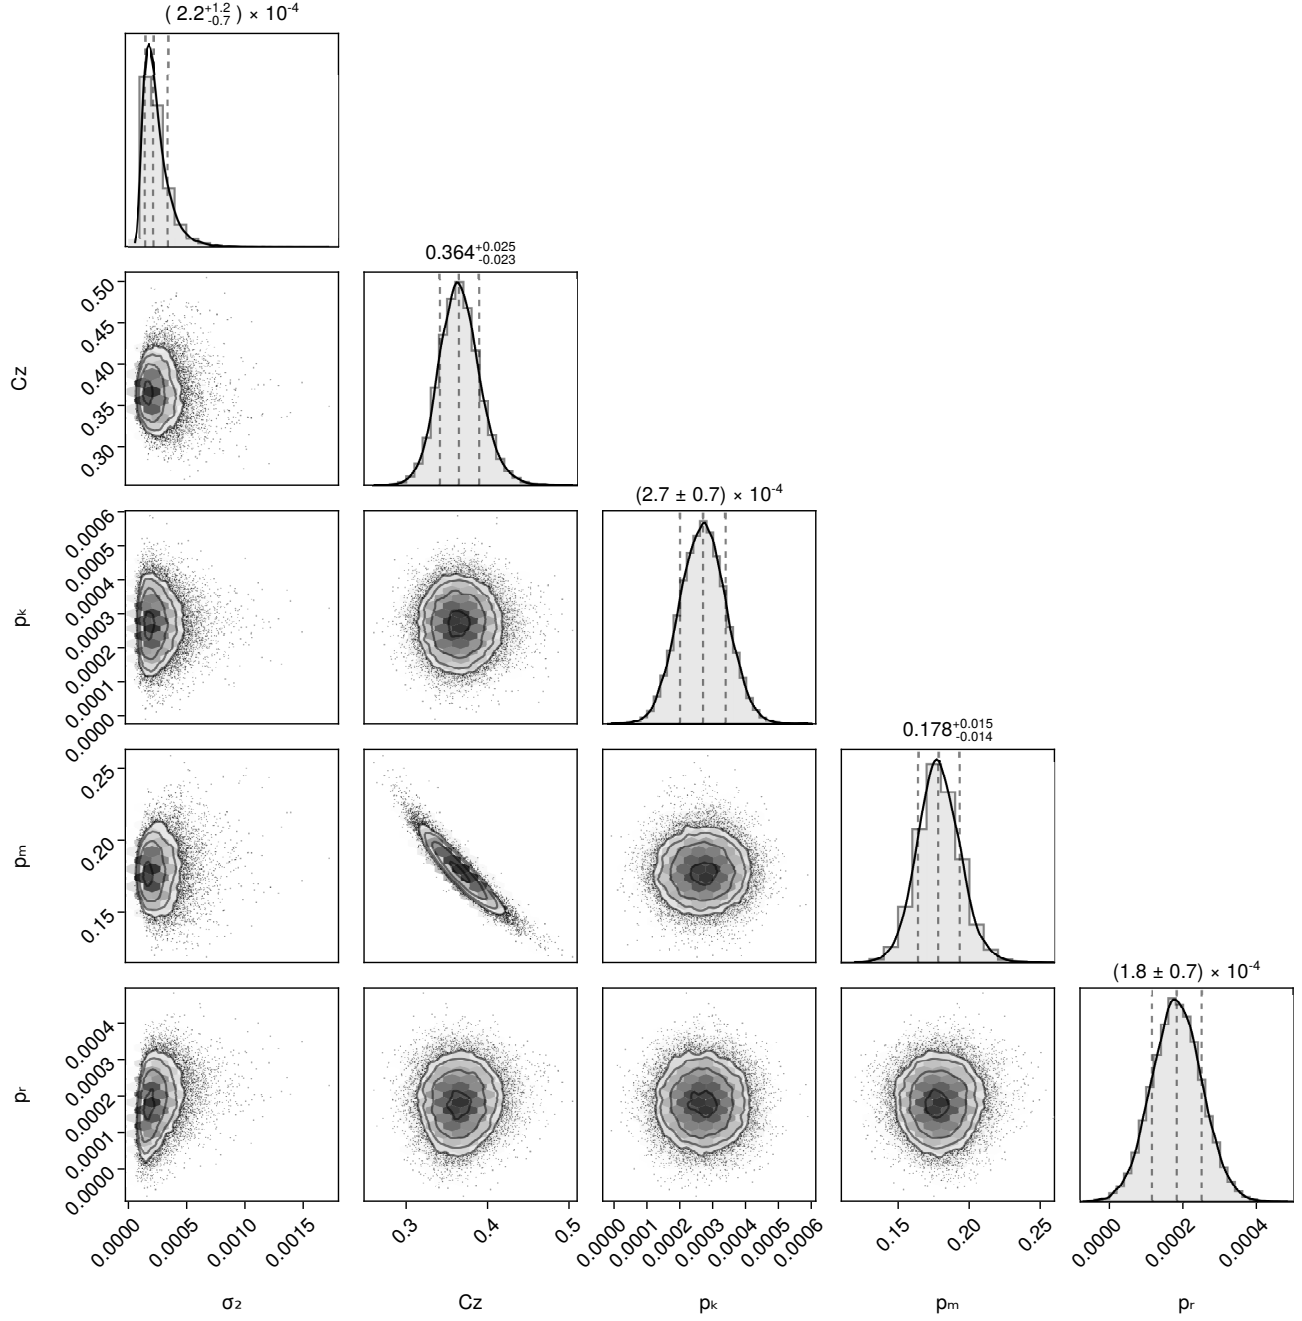

**Figure 3.** Parameters distribution and their covariance for the  $\Lambda$ CDM model.



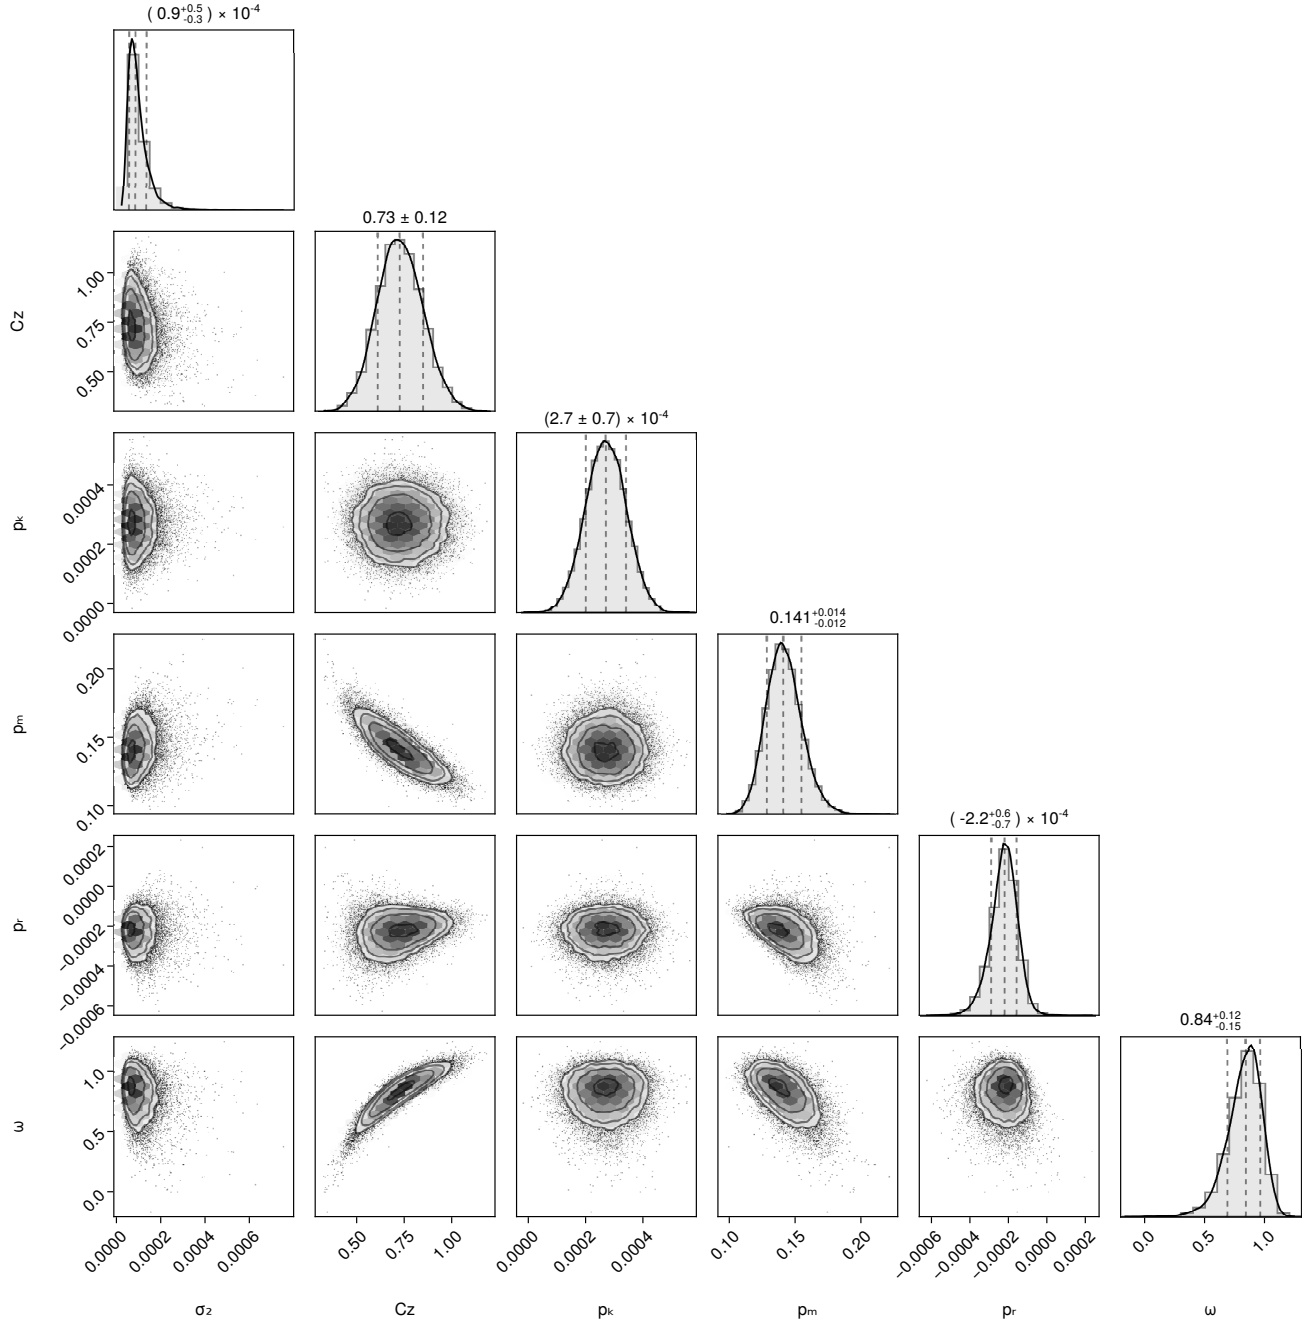

**Figure 4. Parameters distribution and their covariance for the  $w$ CDM model.**

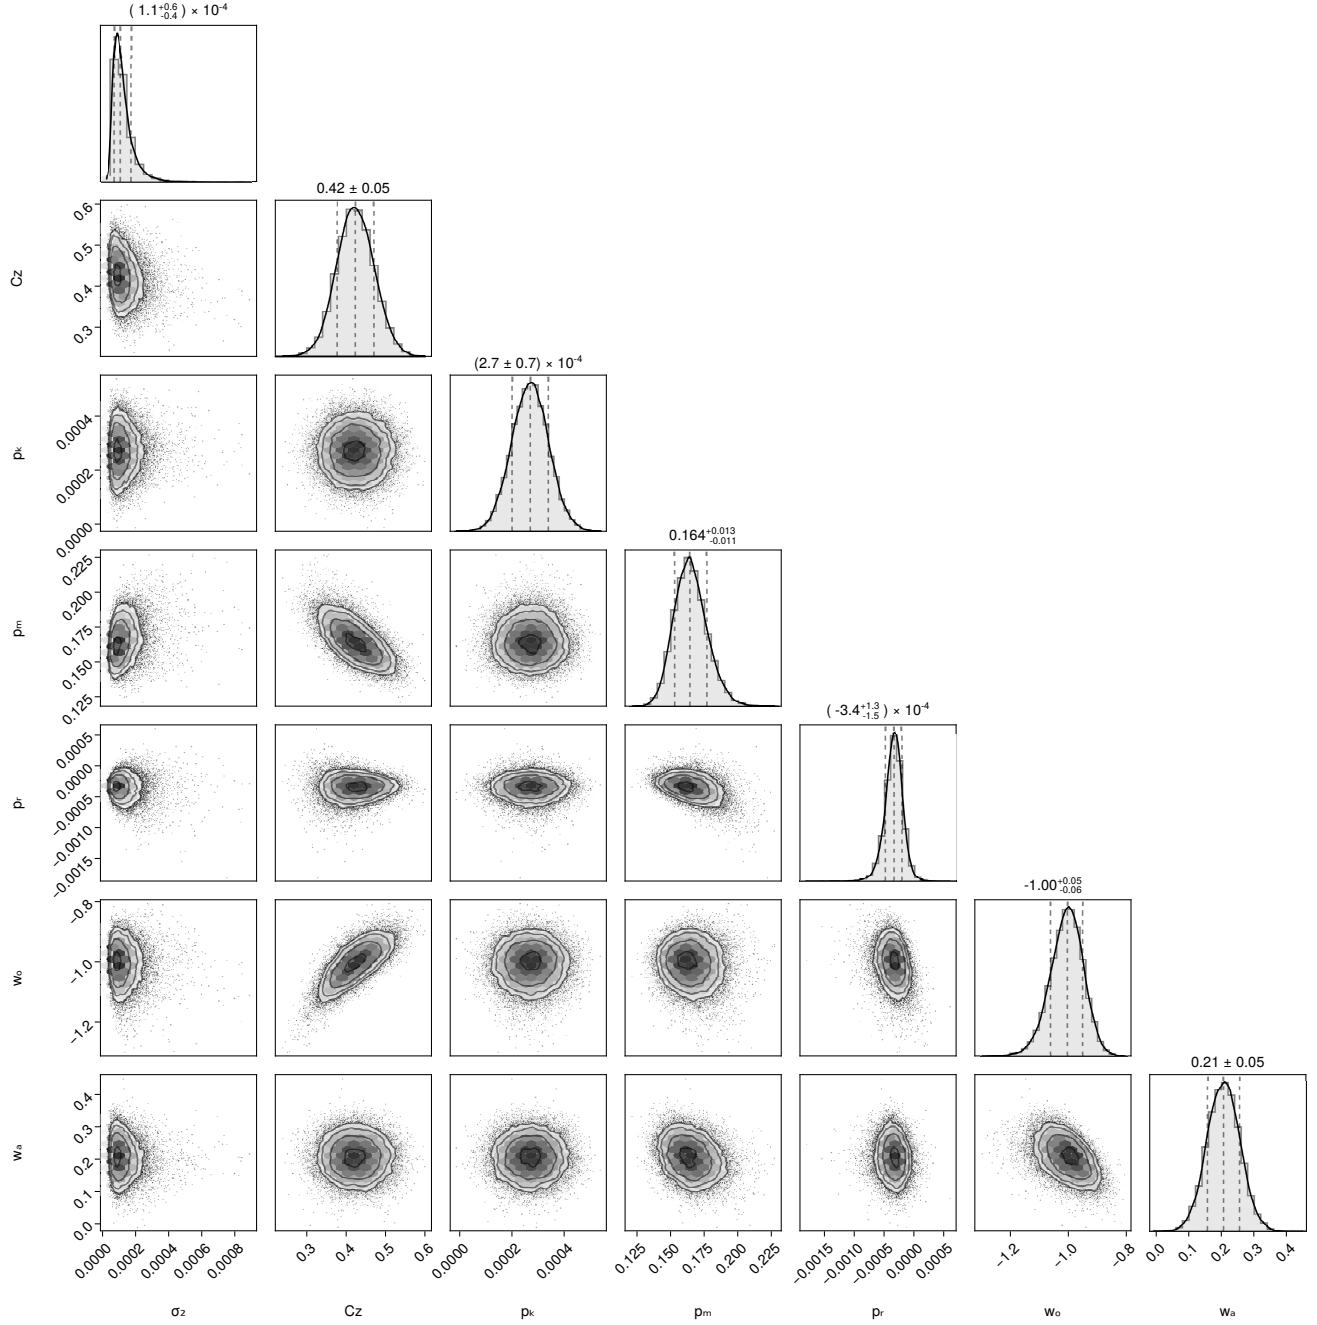

**Figure 5. Parameters distribution and their covariance for the CPL model.**

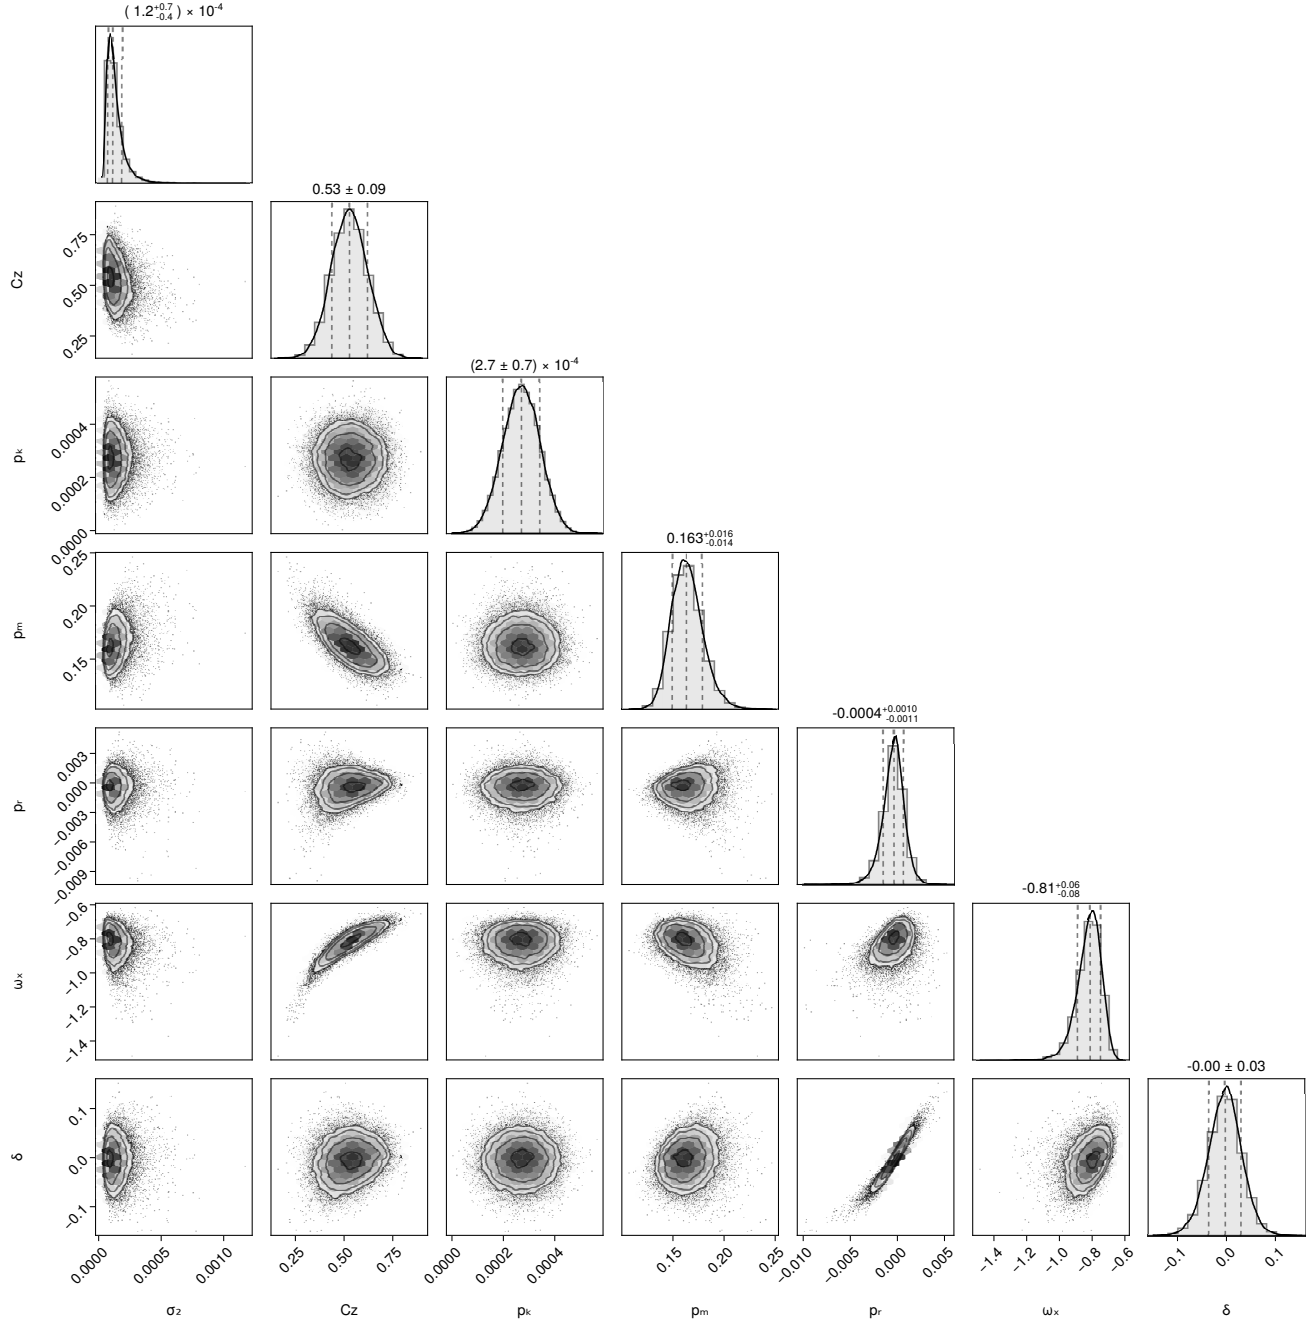

**Figure 6. Parameters distribution and their covariance for the IDE model.**

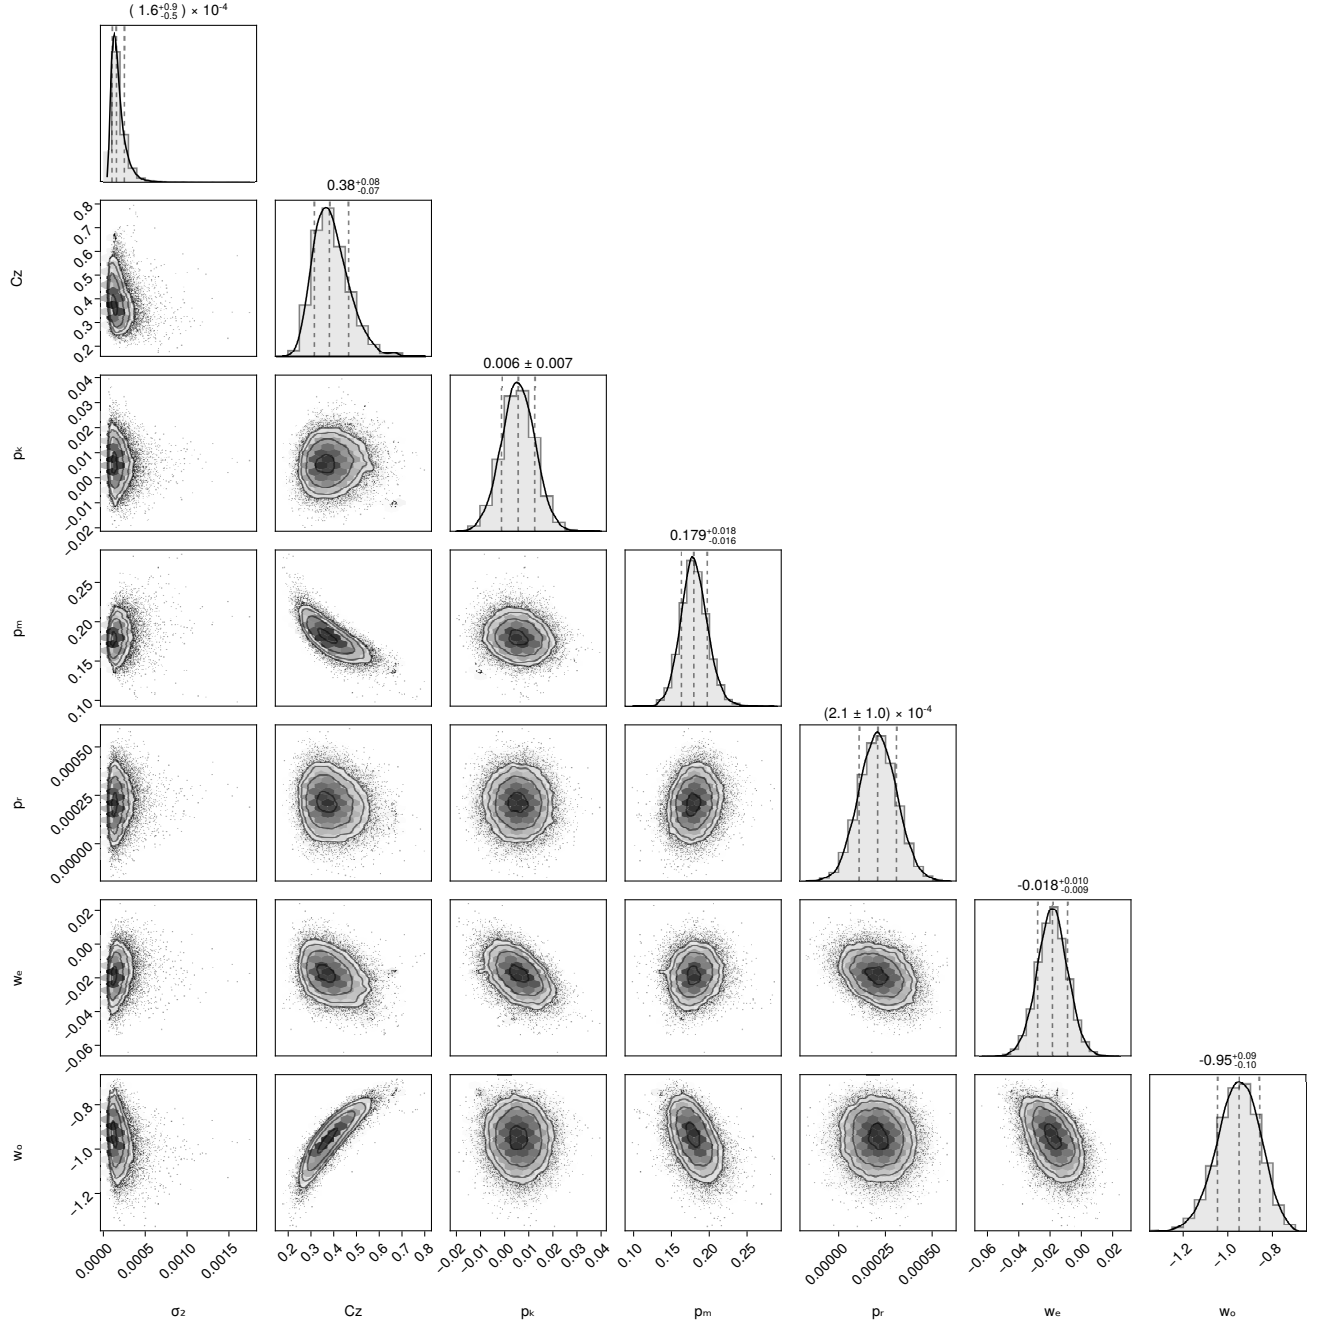

**Figure 7. Parameters distribution and their covariance for the EDE model.**

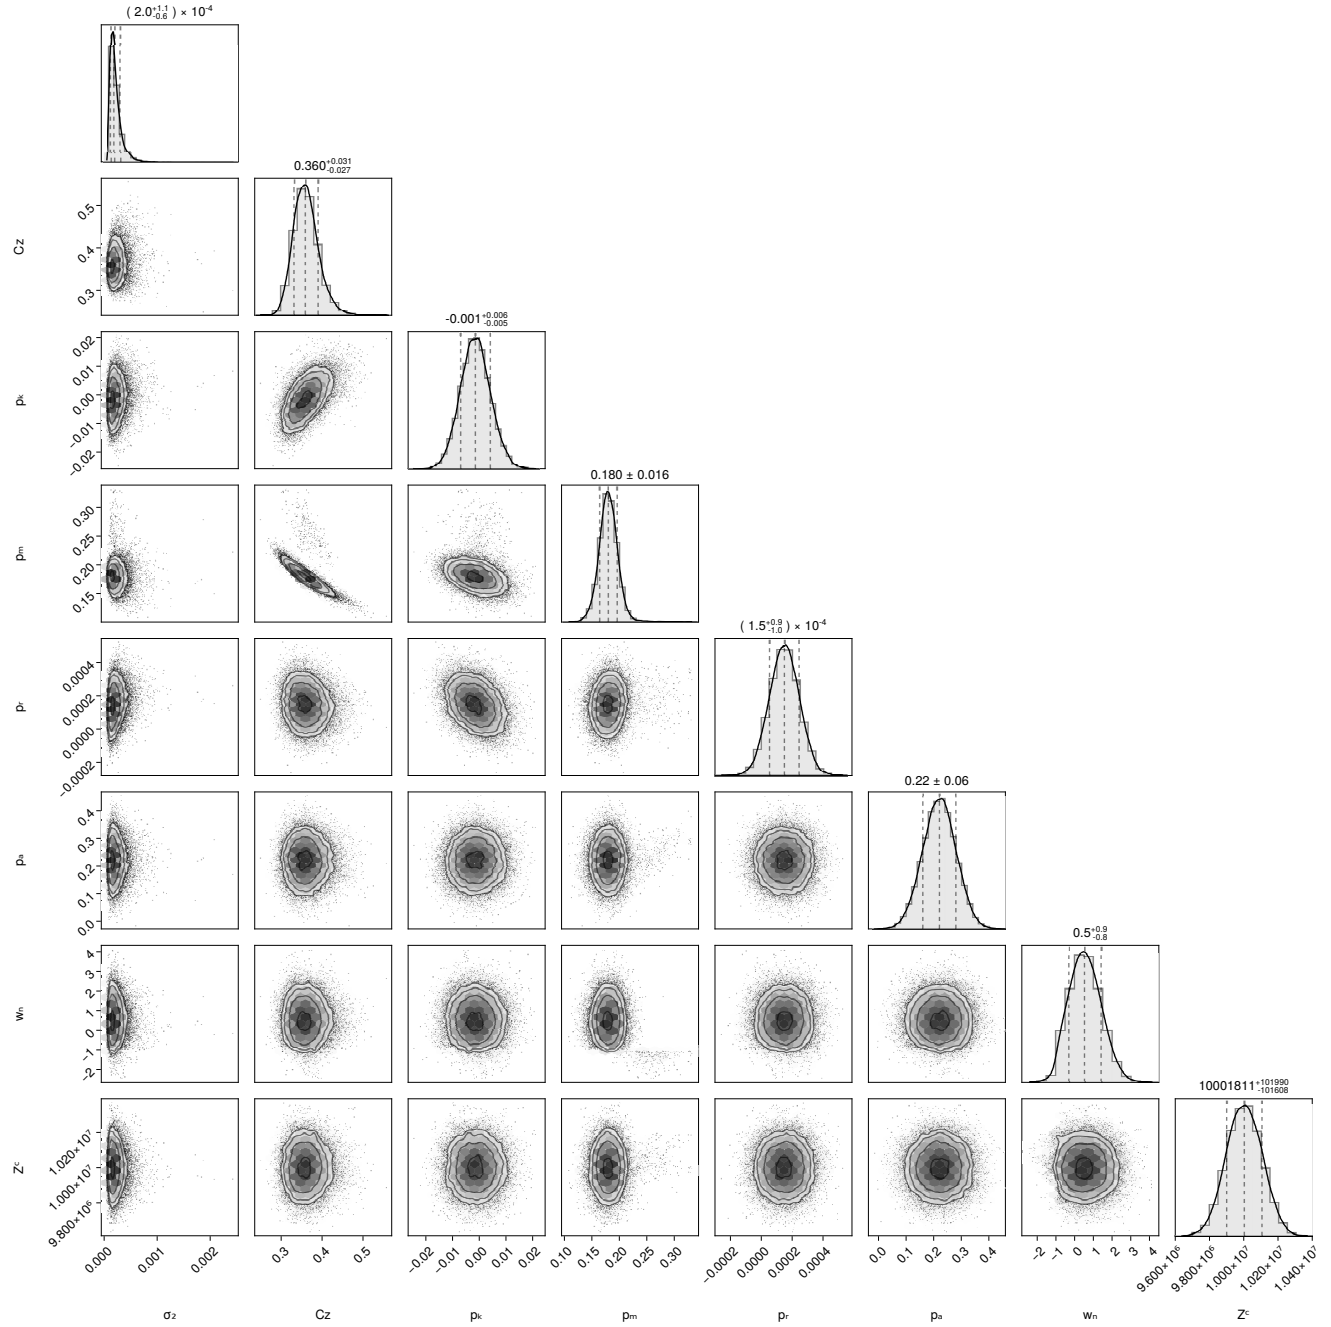

**Figure 8. Parameters distribution and their covariance for the EDEP model.**

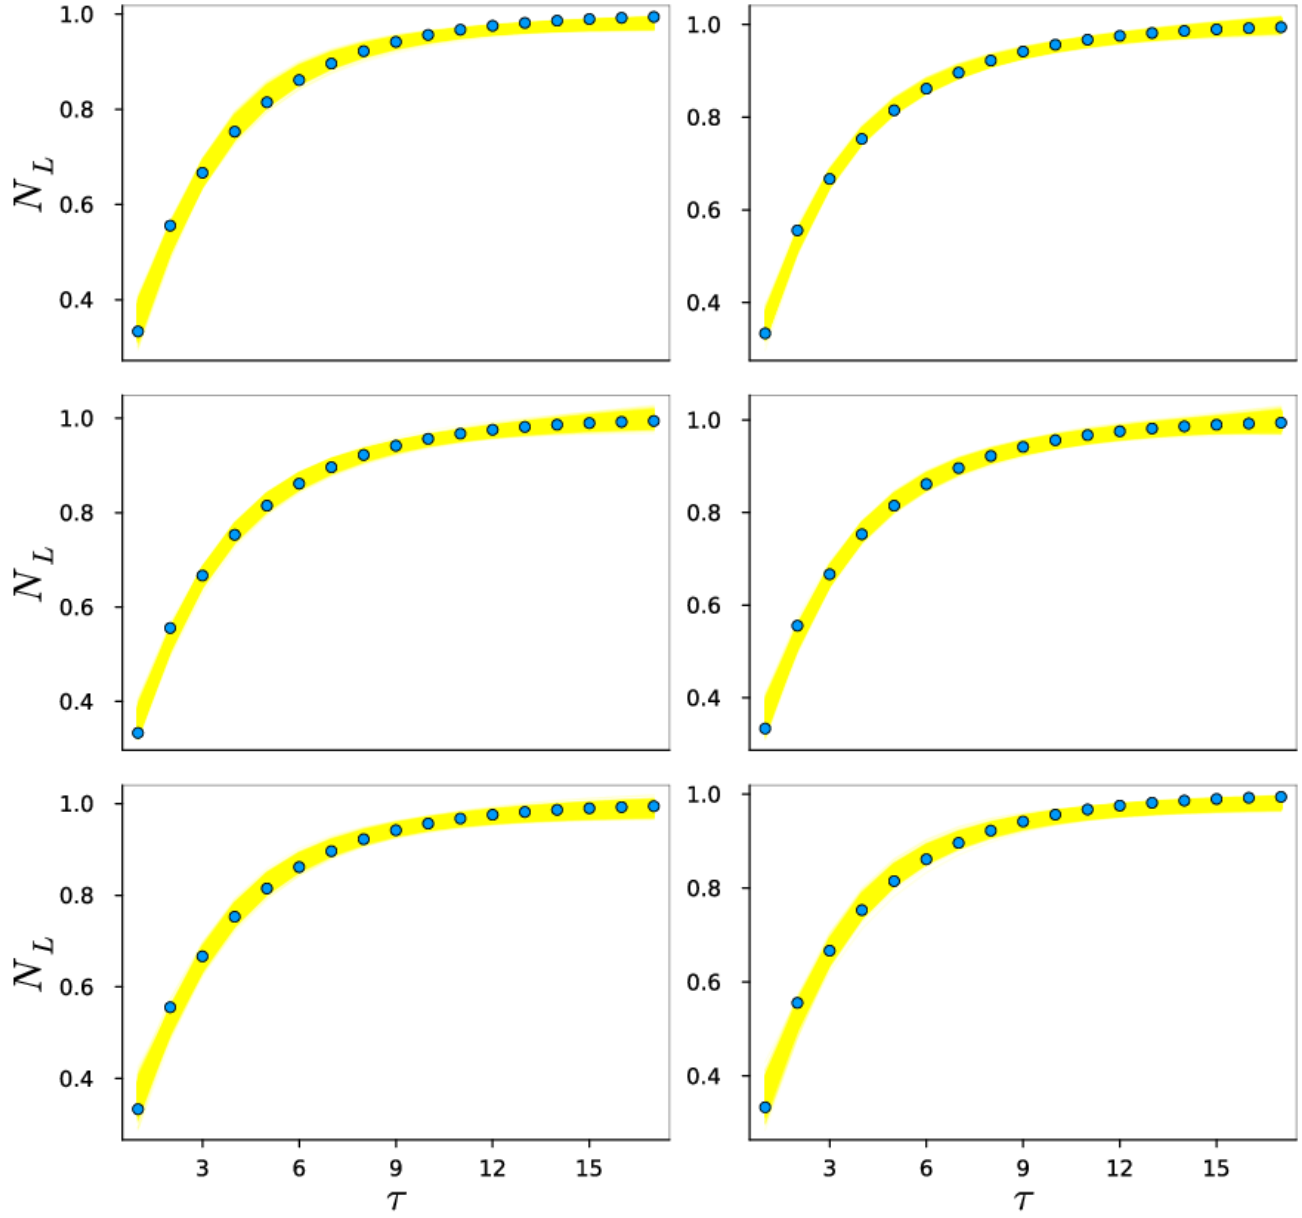

**Figure 9. All cosmological models fitting.** From left to right and from top to bottom  $\Lambda$ CDM,  $w$ CDM, CPL, IDE, EDE and EDEP models fitted using Julia's Turing.jl Bayesian inference.

## 70 References

- 71 **1.** Cabrera J. L., Gutiérrez D. E. & Rodríguez M., Criticality and the fractal structure of  $-5/3$  turbulent cascades.  
72 Chaos, Solitons and Fractals **146** 110876 (2021).
- 73 **2.** Komatsu, E. et al., Seven-Year Wilkinson Microwave Anisotropy Probe (WMAP\*) Observations: Cosmological  
74 Interpretation. The Astrophysical Journal Supplement Series **192**, 18 (2011)
- 75 **3.** Shi, K., Huang, Y. F. & Lu, T., A comprehensive comparison of cosmological models from the latest observational  
76 data. Monthly Notices of the Royal Astronomical Society **426**, 2452-2462 (2012).
- 77 **4.** Doran, M., Schwindt, J-M., & Wetterich, C., Structure formation and the time dependence of quintessence. Phys.  
78 Rev. D **64** 123520 (2001).
- 79 **5.** Doran, M. & Robbers, G., Early dark energy cosmologies. Journal of Cosmology and Astroparticle Physics **6**  
80 026 (2006).
- 81 **6.** Poulin, V., Smith T. L., Grin D., Karwal T. & Kamionkowski, M., Cosmological implications of ultralight  
82 axionlike fields. Phys. Rev. D **98** 083525 (2018).
- 83 **7.** Hoffman, M. D. & Gelman, A., vJournal of Machine Learning Research **15**, 1593-1623 (2014).
- 84 **8.** Salahedin, F., Pazhouhesh, R., Malekjani, M.. Cosmological constraints on new generalized Chaplygin gas model.  
85 Eur. Phys. J. Plus **135**, 429 (2020).
- 86 **9.** Komatsu, E. et al., Seven-Year Wilkinson Microwave Anisotropy Probe (WMAP\*) Observations: Cosmological  
87 Interpretation. The Astrophysical Journal Supplement Series **192**, 18 (2011)
