# Supplementary figures and images for: Black hole information turbulence and the Hubble tension
Source: Research Square preprint supplement (doi:10.21203/rs.3.rs-6727087/v1), 2025-08-05

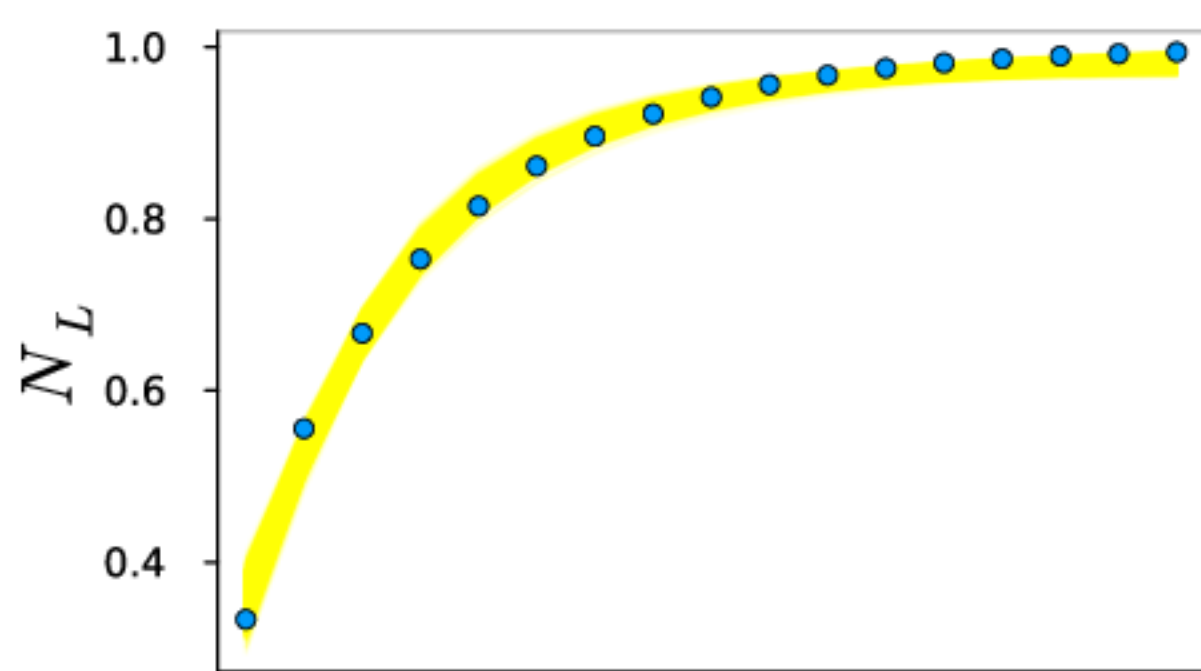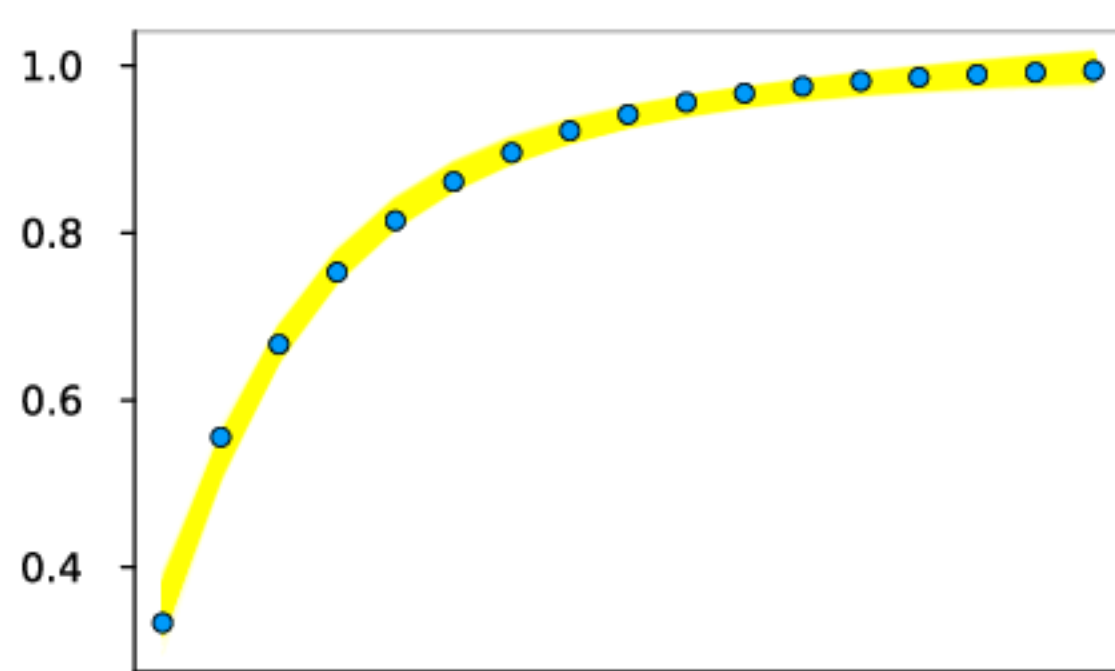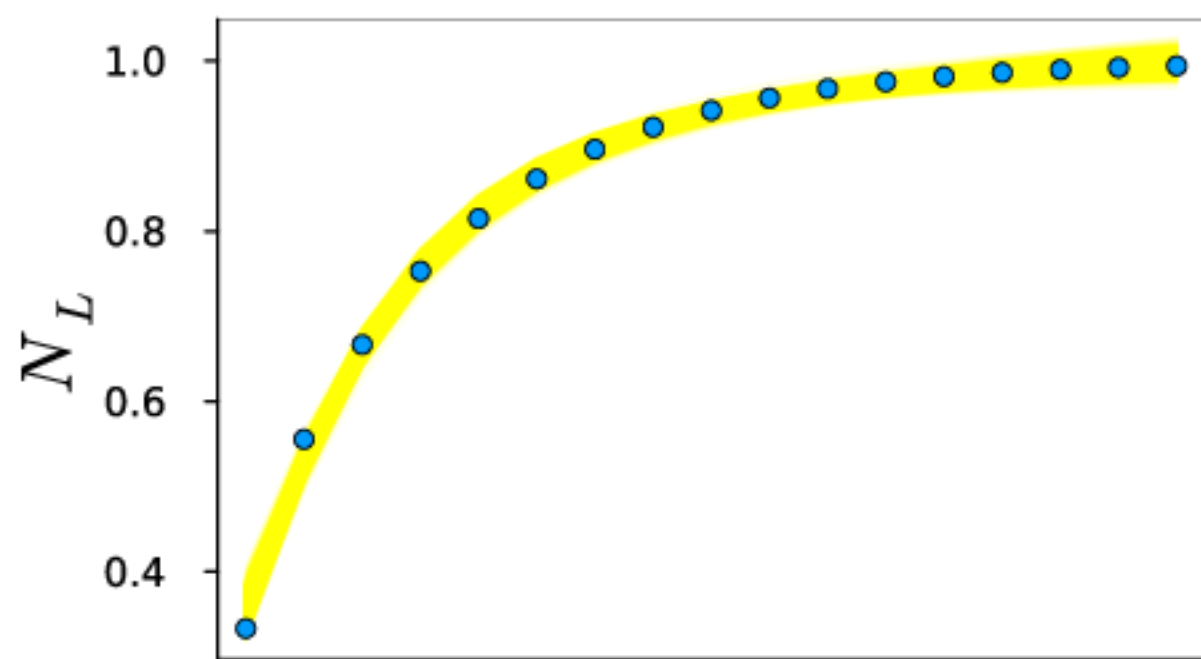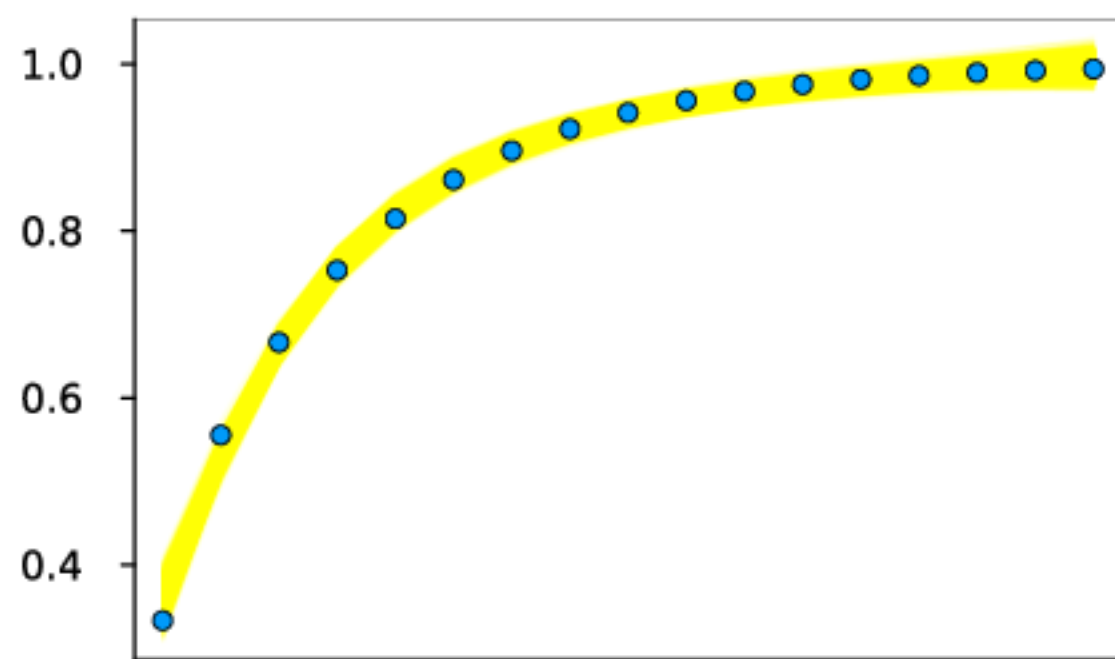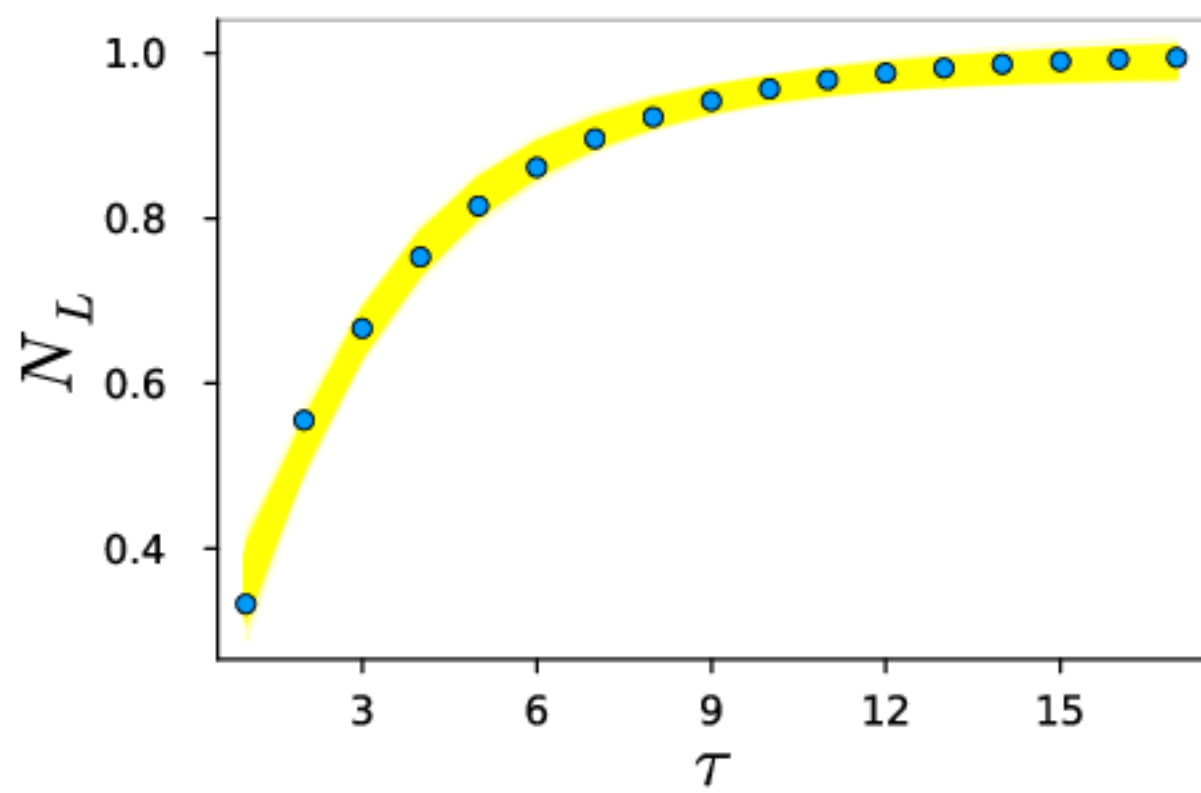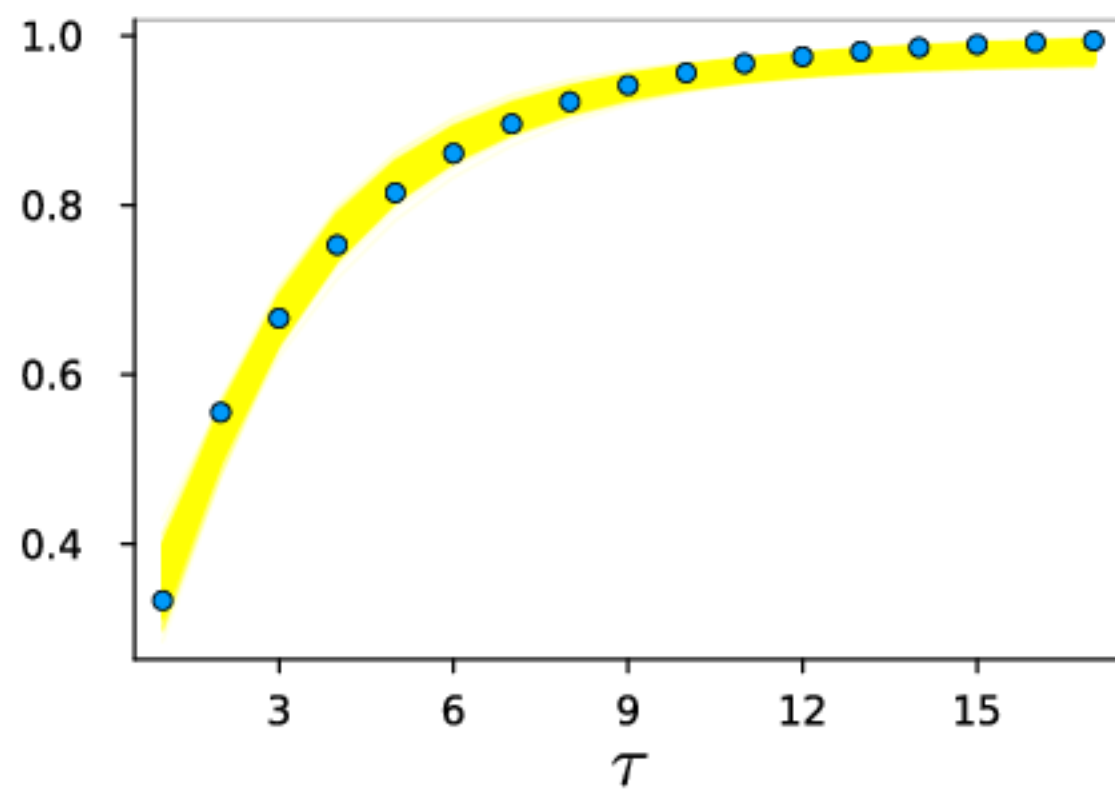

Supplement: Supplementary file 1 [file SI_fig9.pdf › SuppInfAmend2/SI_fig9.pdf]

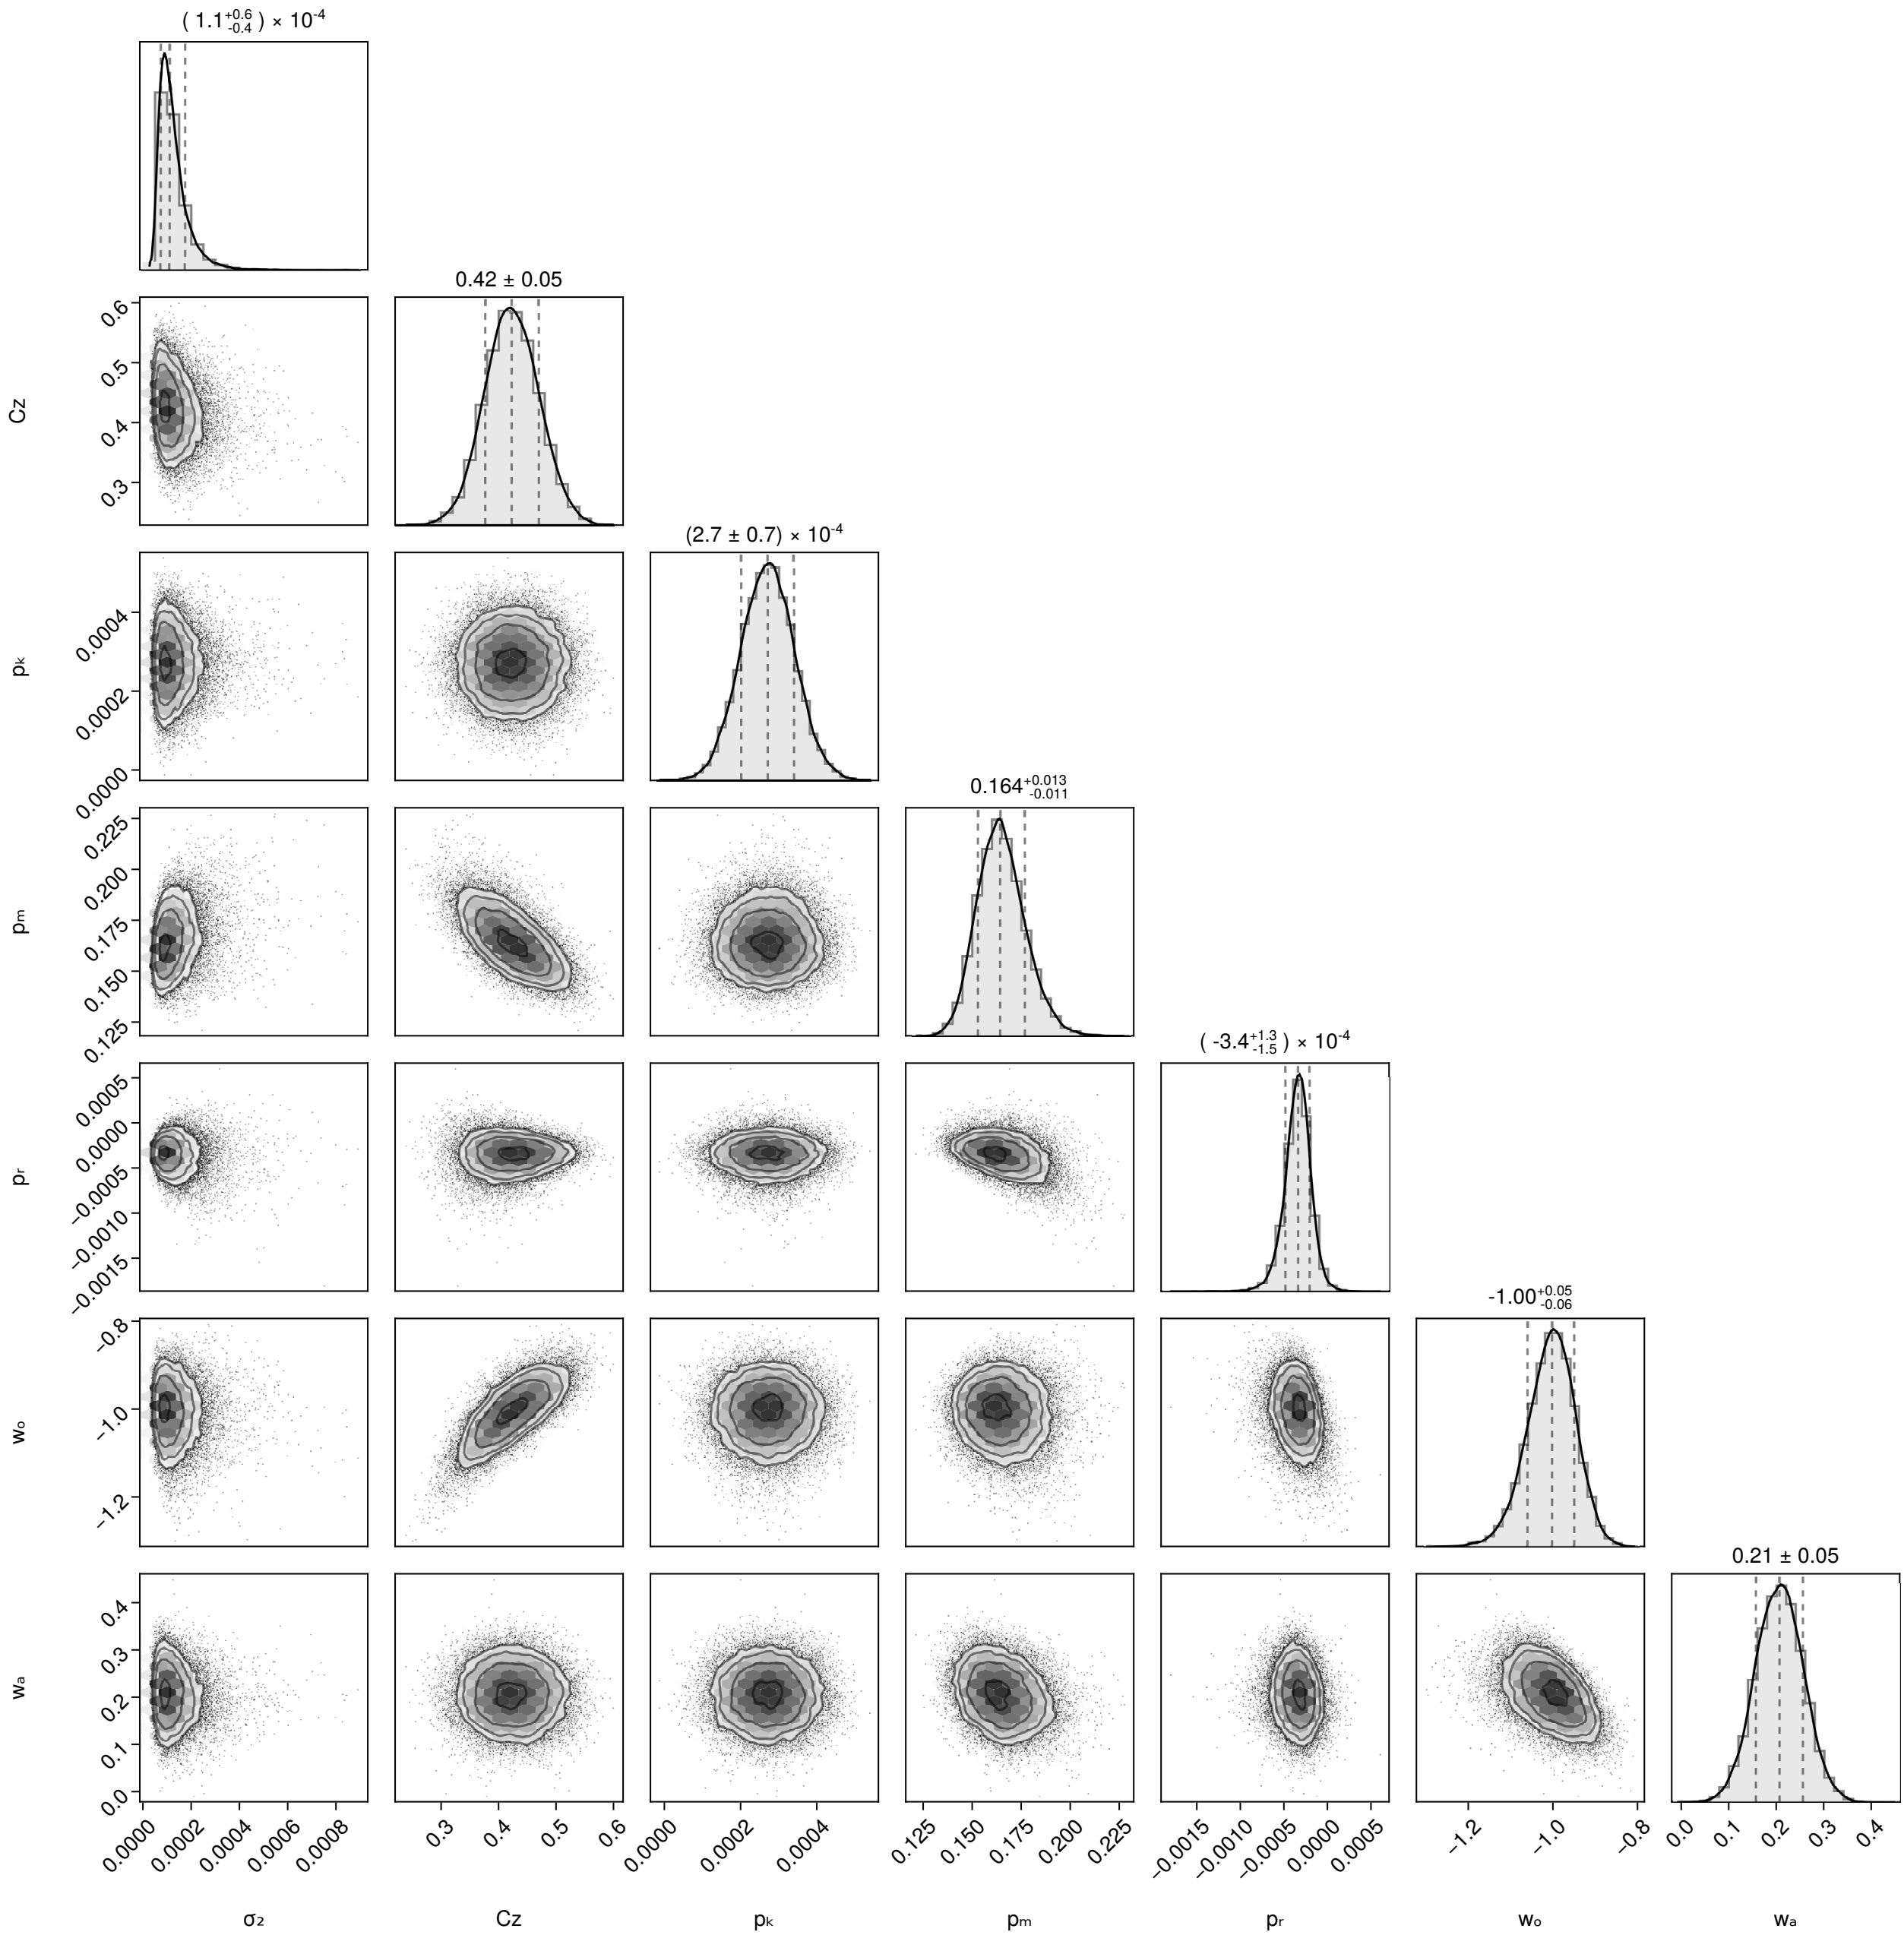

Supplement: Supplementary file 2 [file SI_ppCPL.pdf › SuppInfAmend2/SI_ppCPL.pdf]

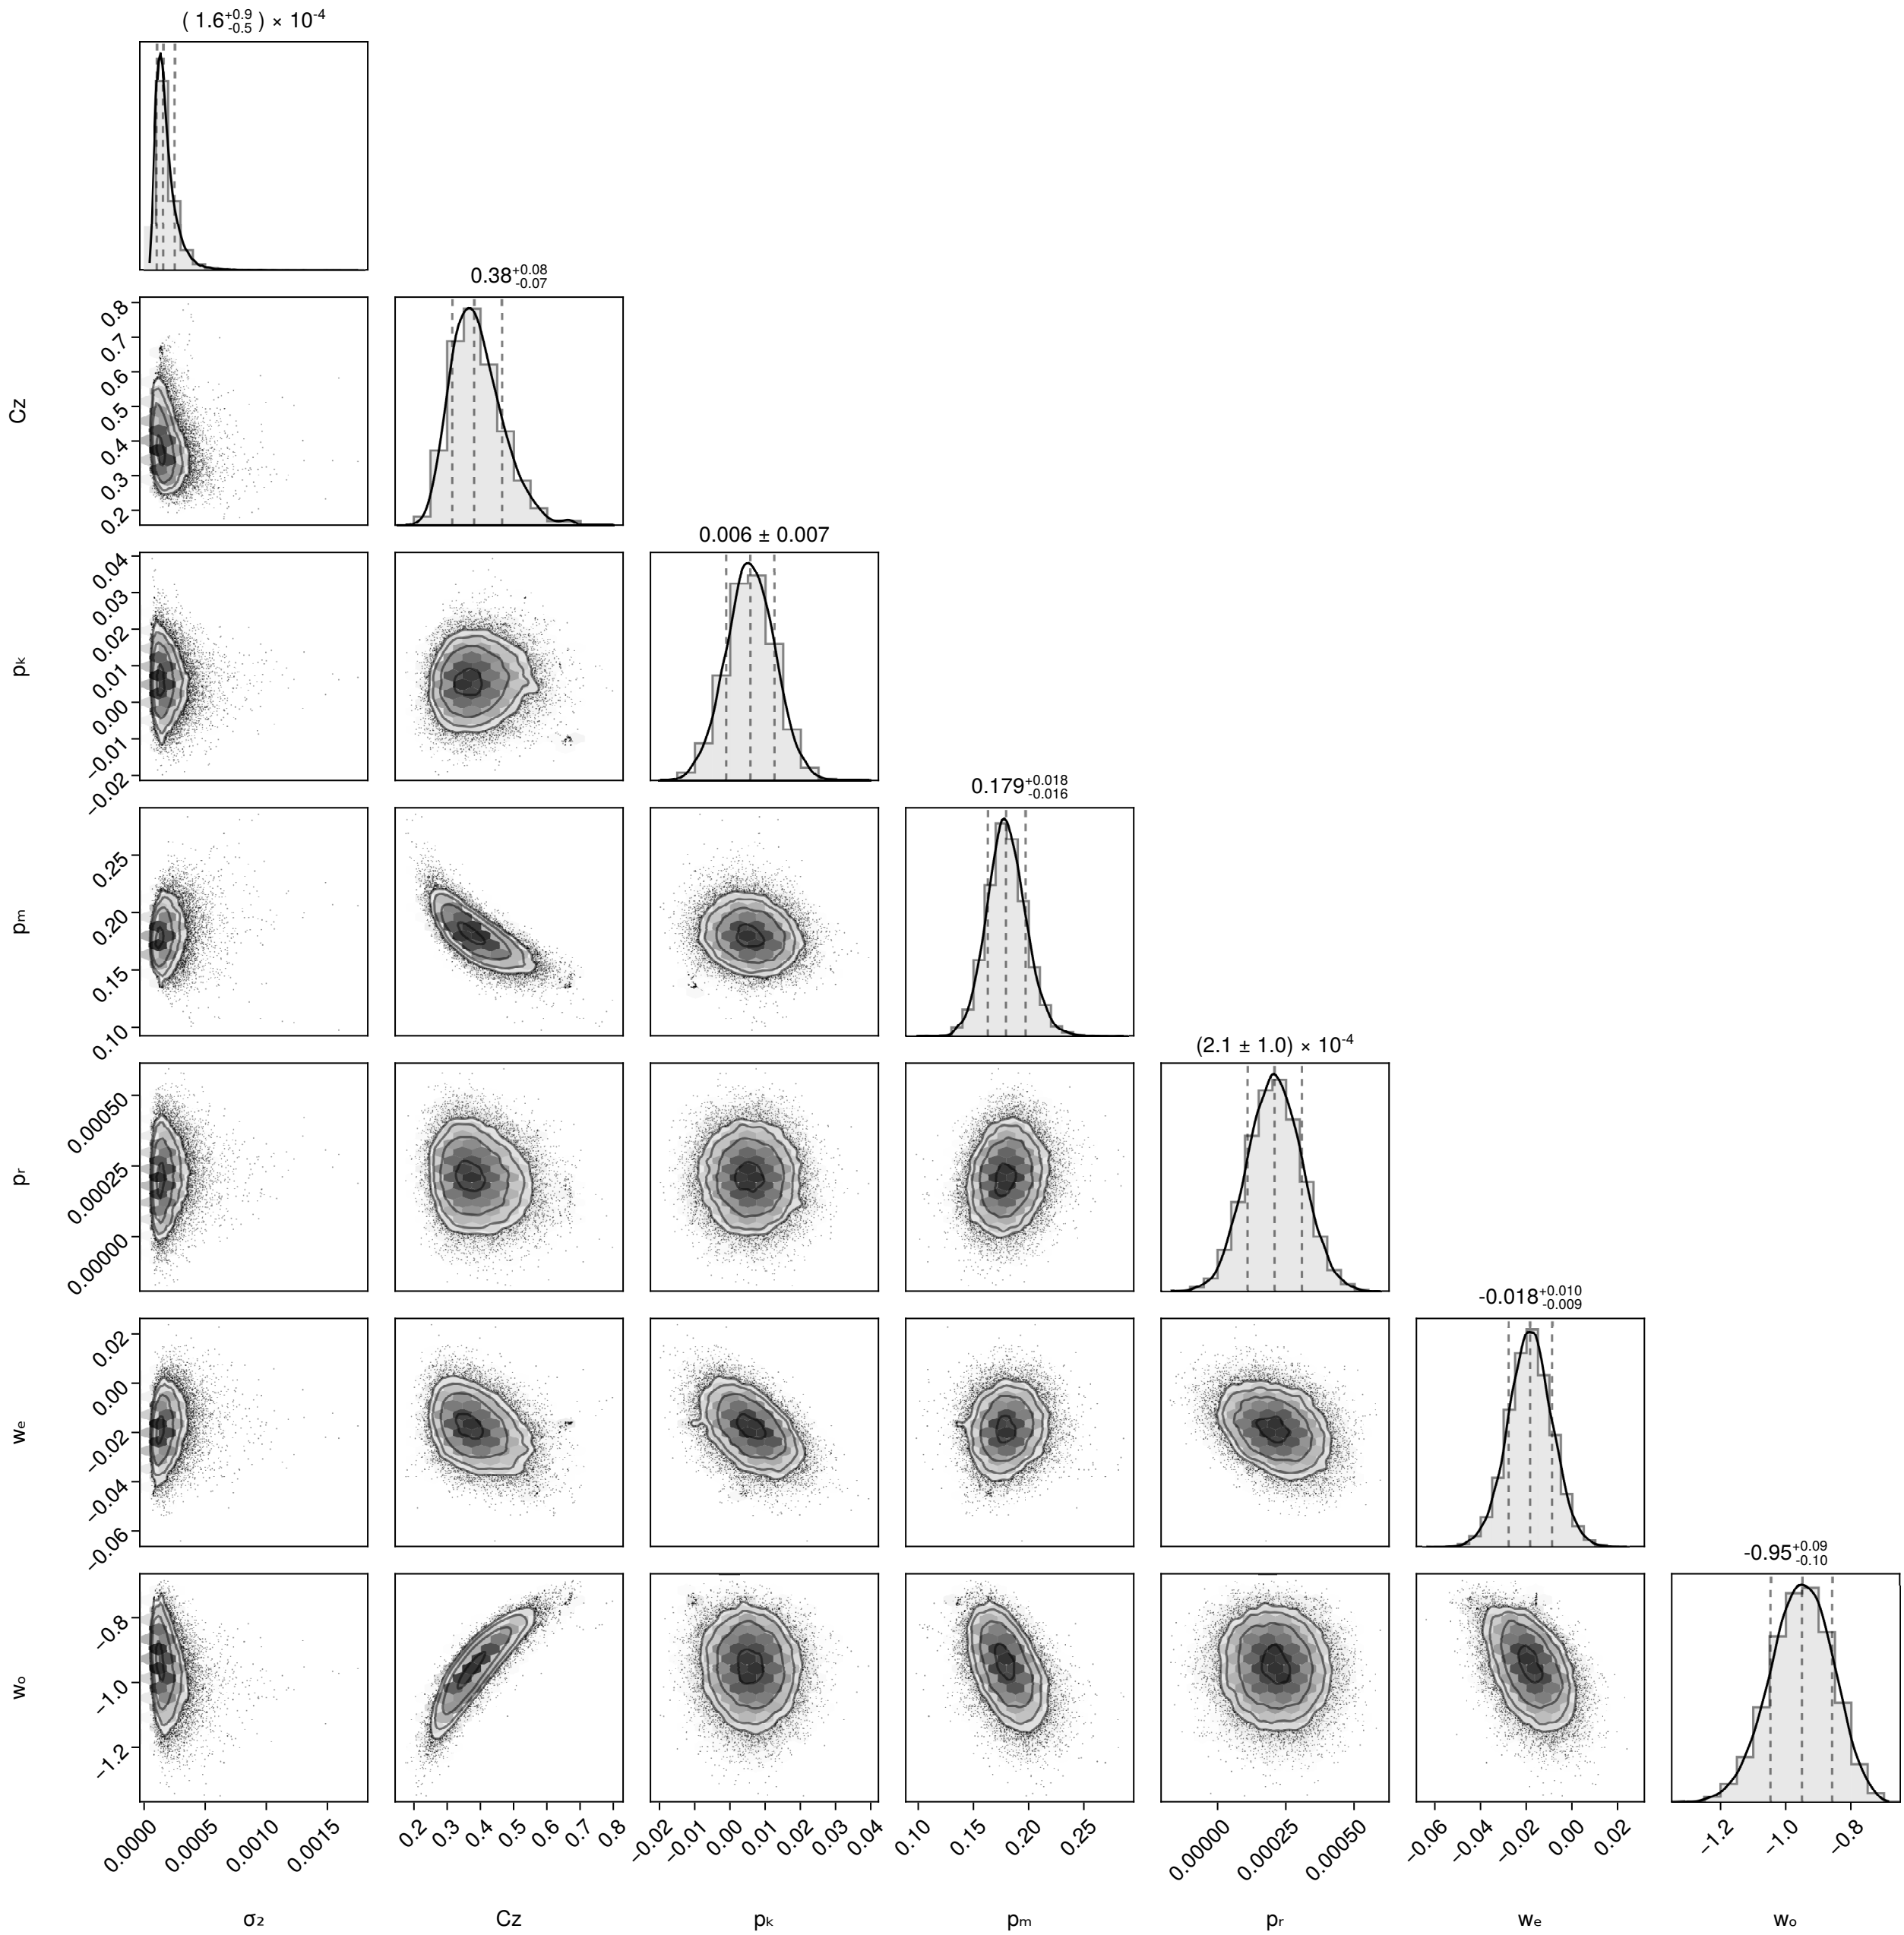

Supplement: Supplementary file 3 [file SI_ppEDE.pdf › SuppInfAmend2/SI_ppEDE.pdf]

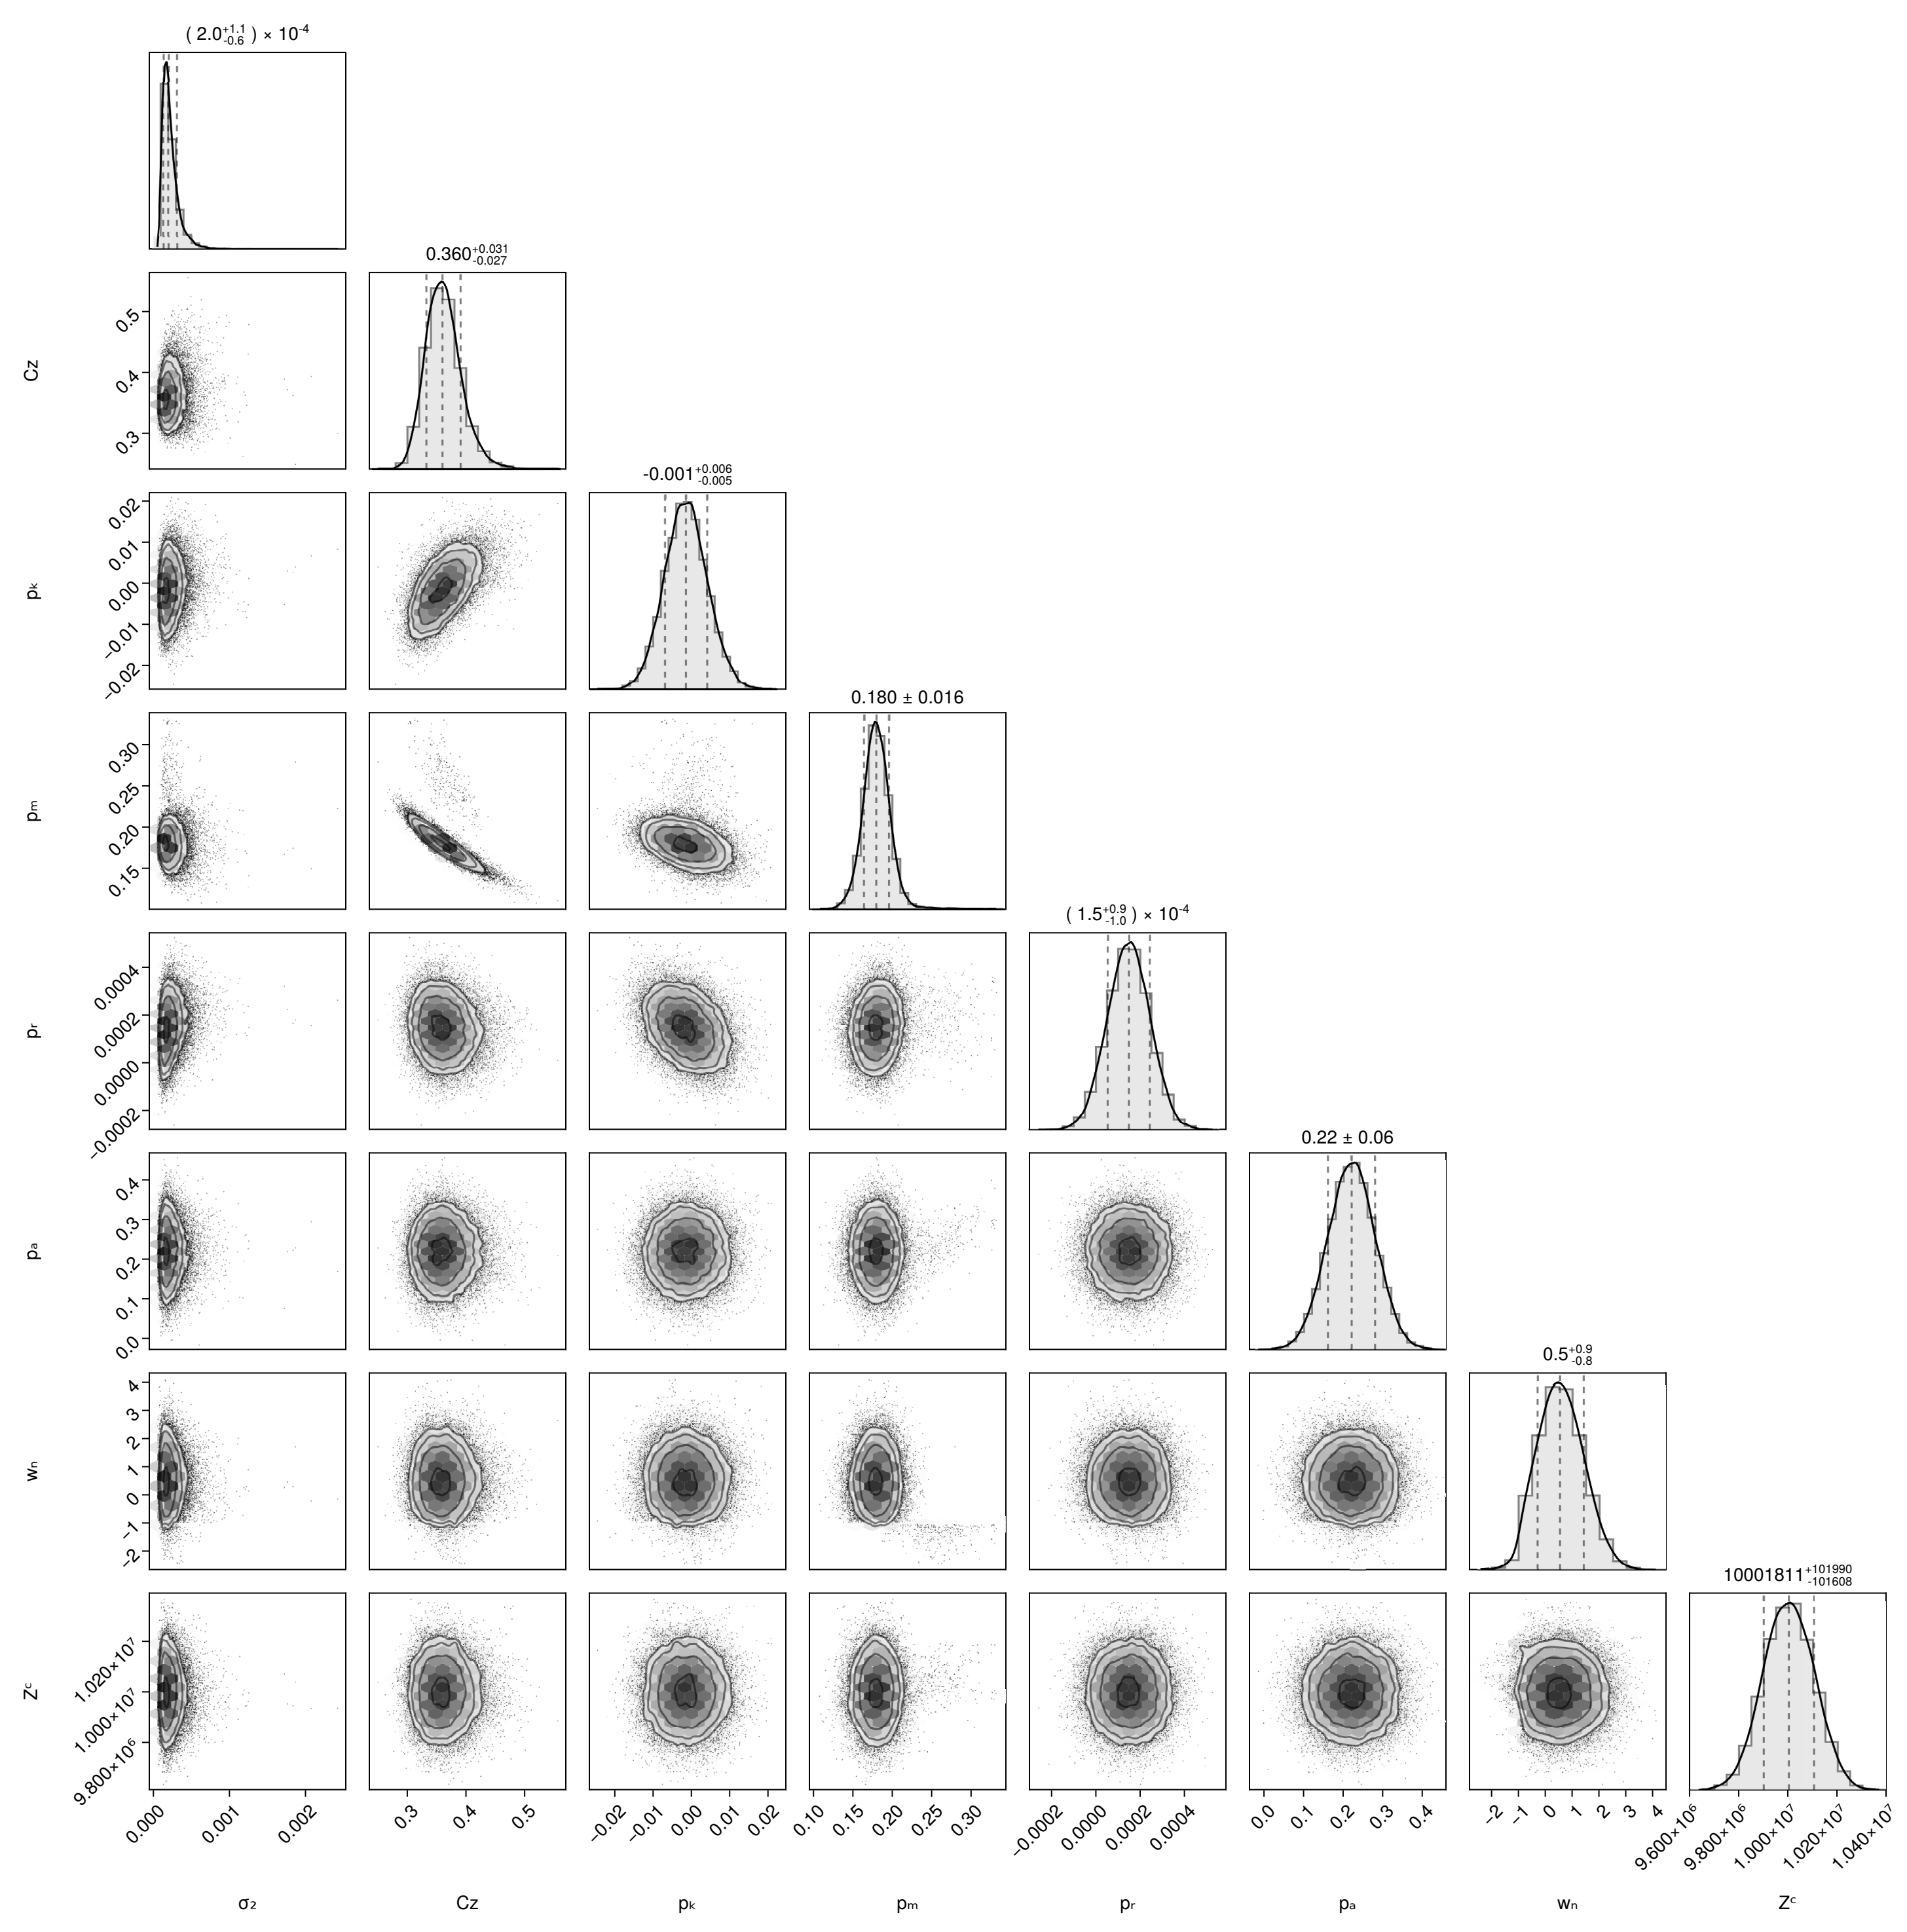

Supplement: Supplementary file 4 [file SI_ppEDEP.pdf › SuppInfAmend2/SI_ppEDEP.pdf]

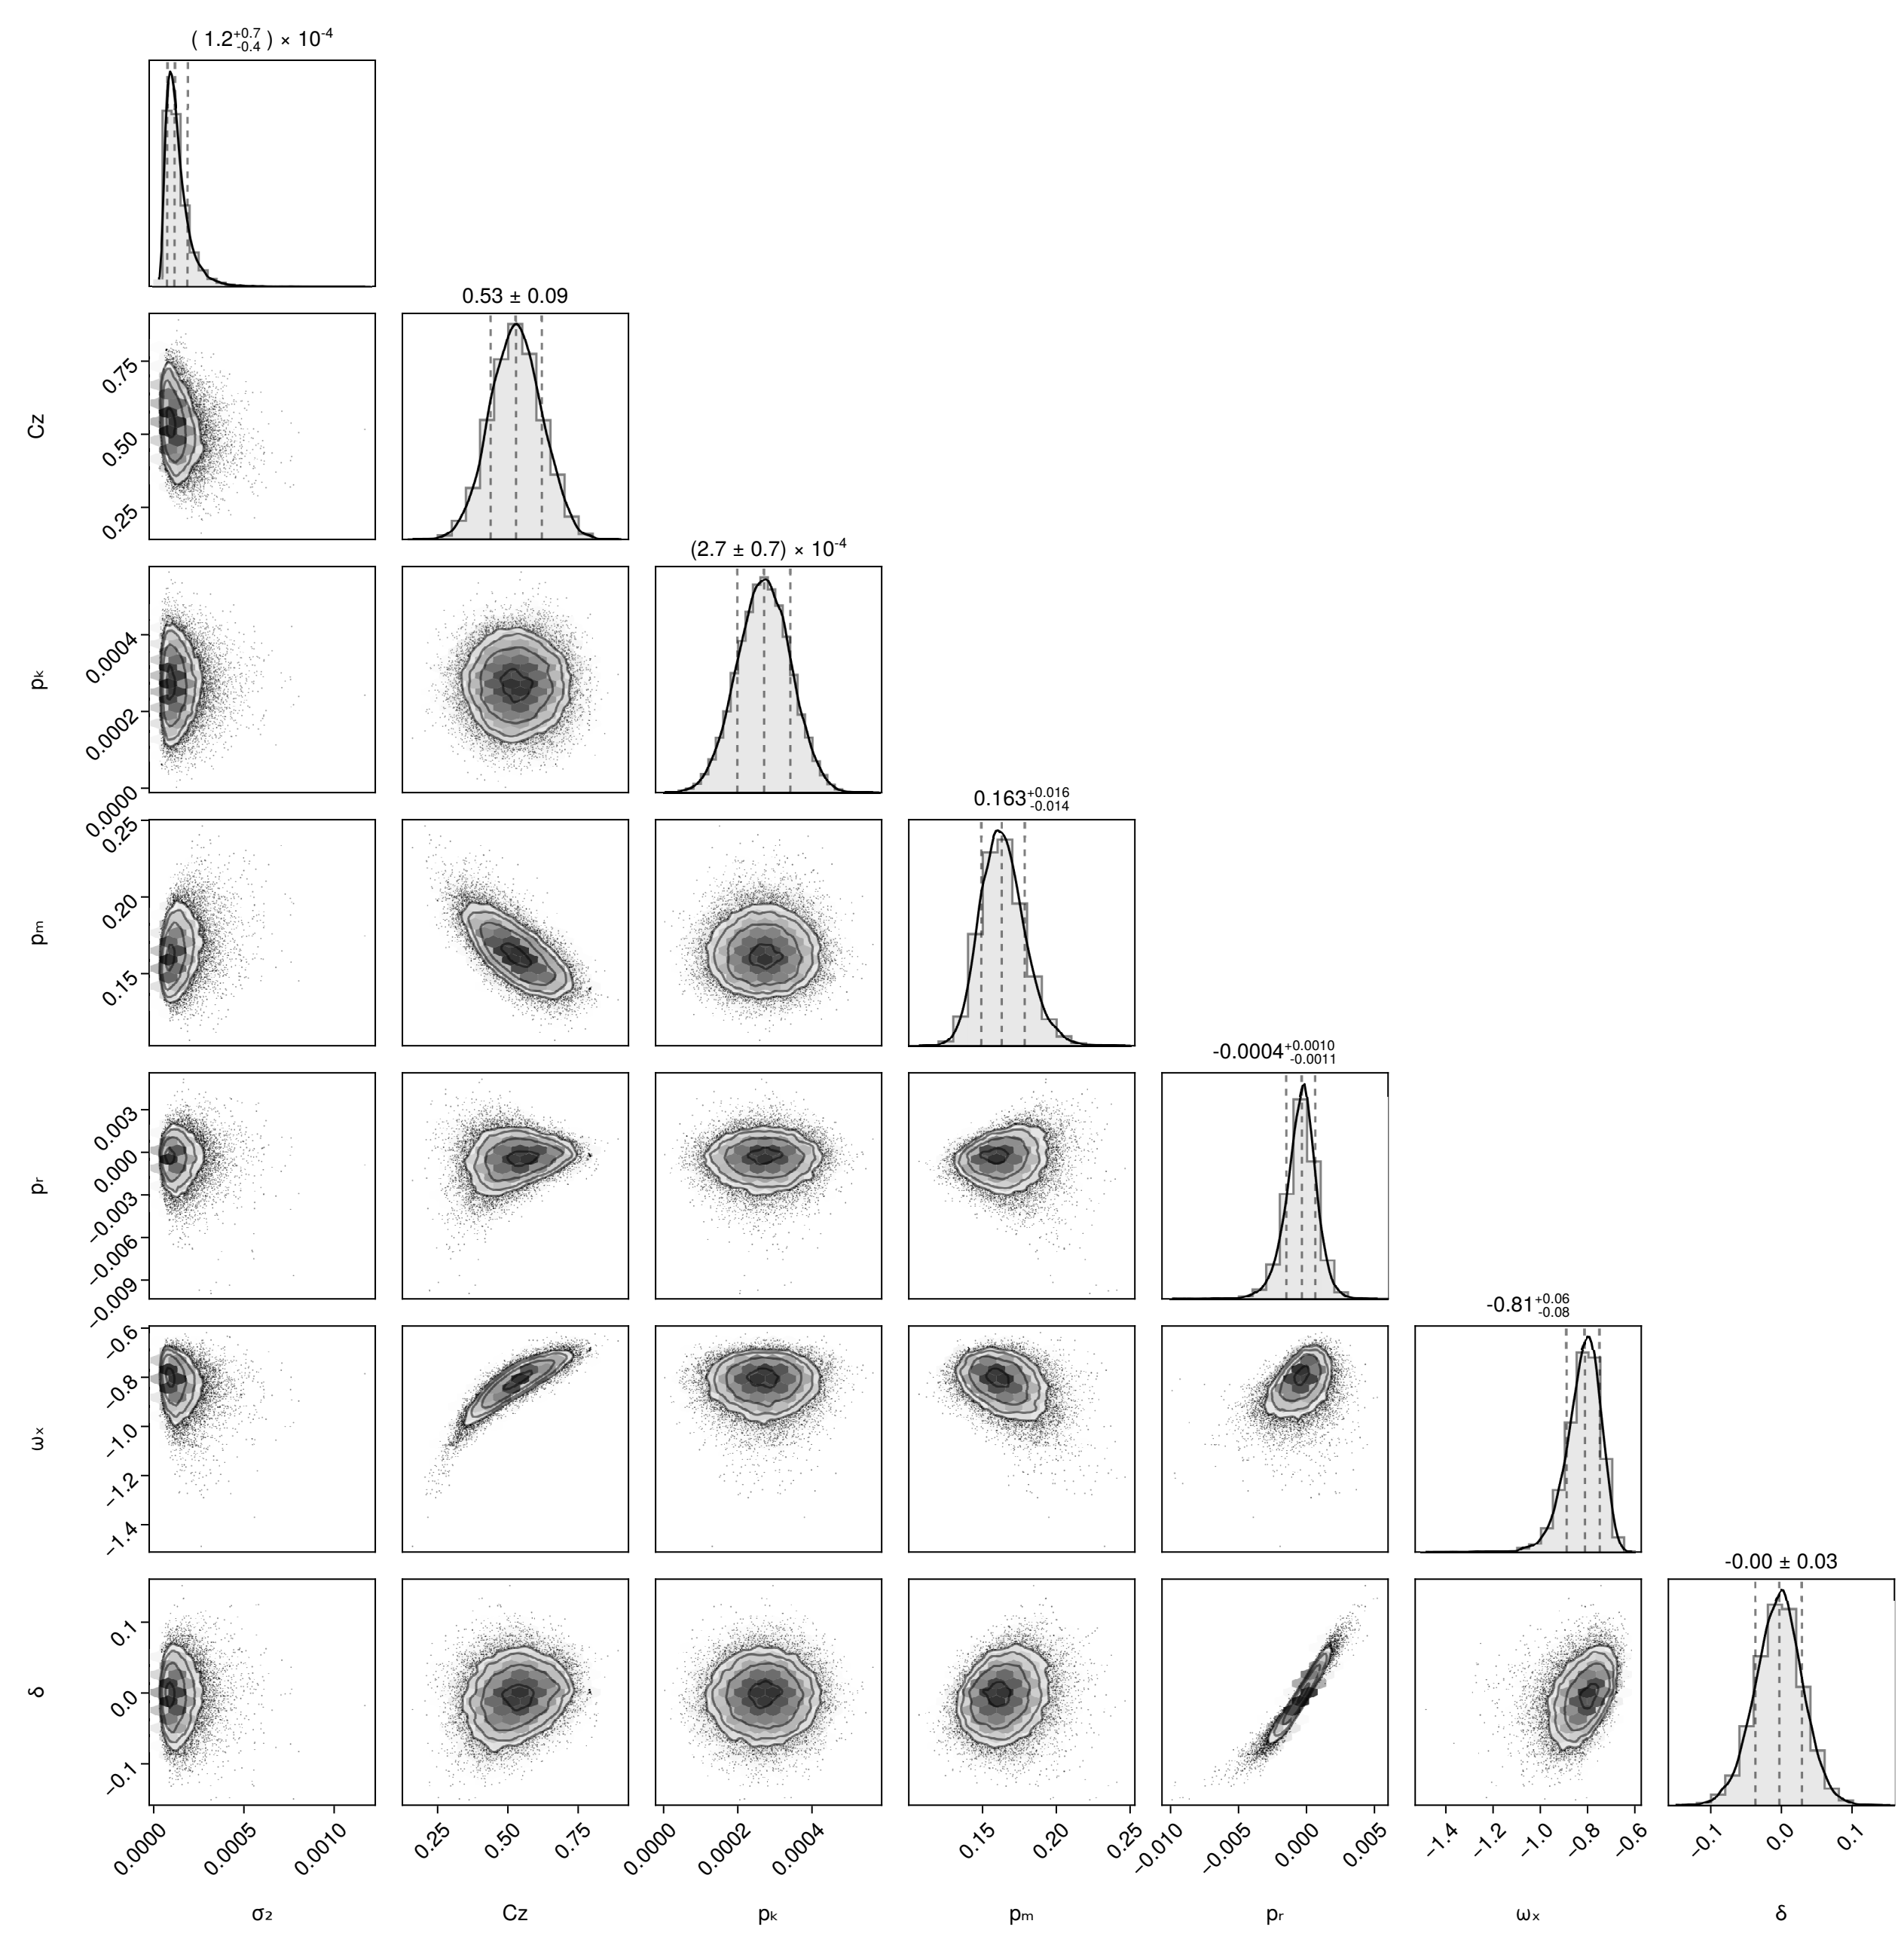

Supplement: Supplementary file 5 [file SI_ppIDE.pdf › SuppInfAmend2/SI_ppIDE.pdf]

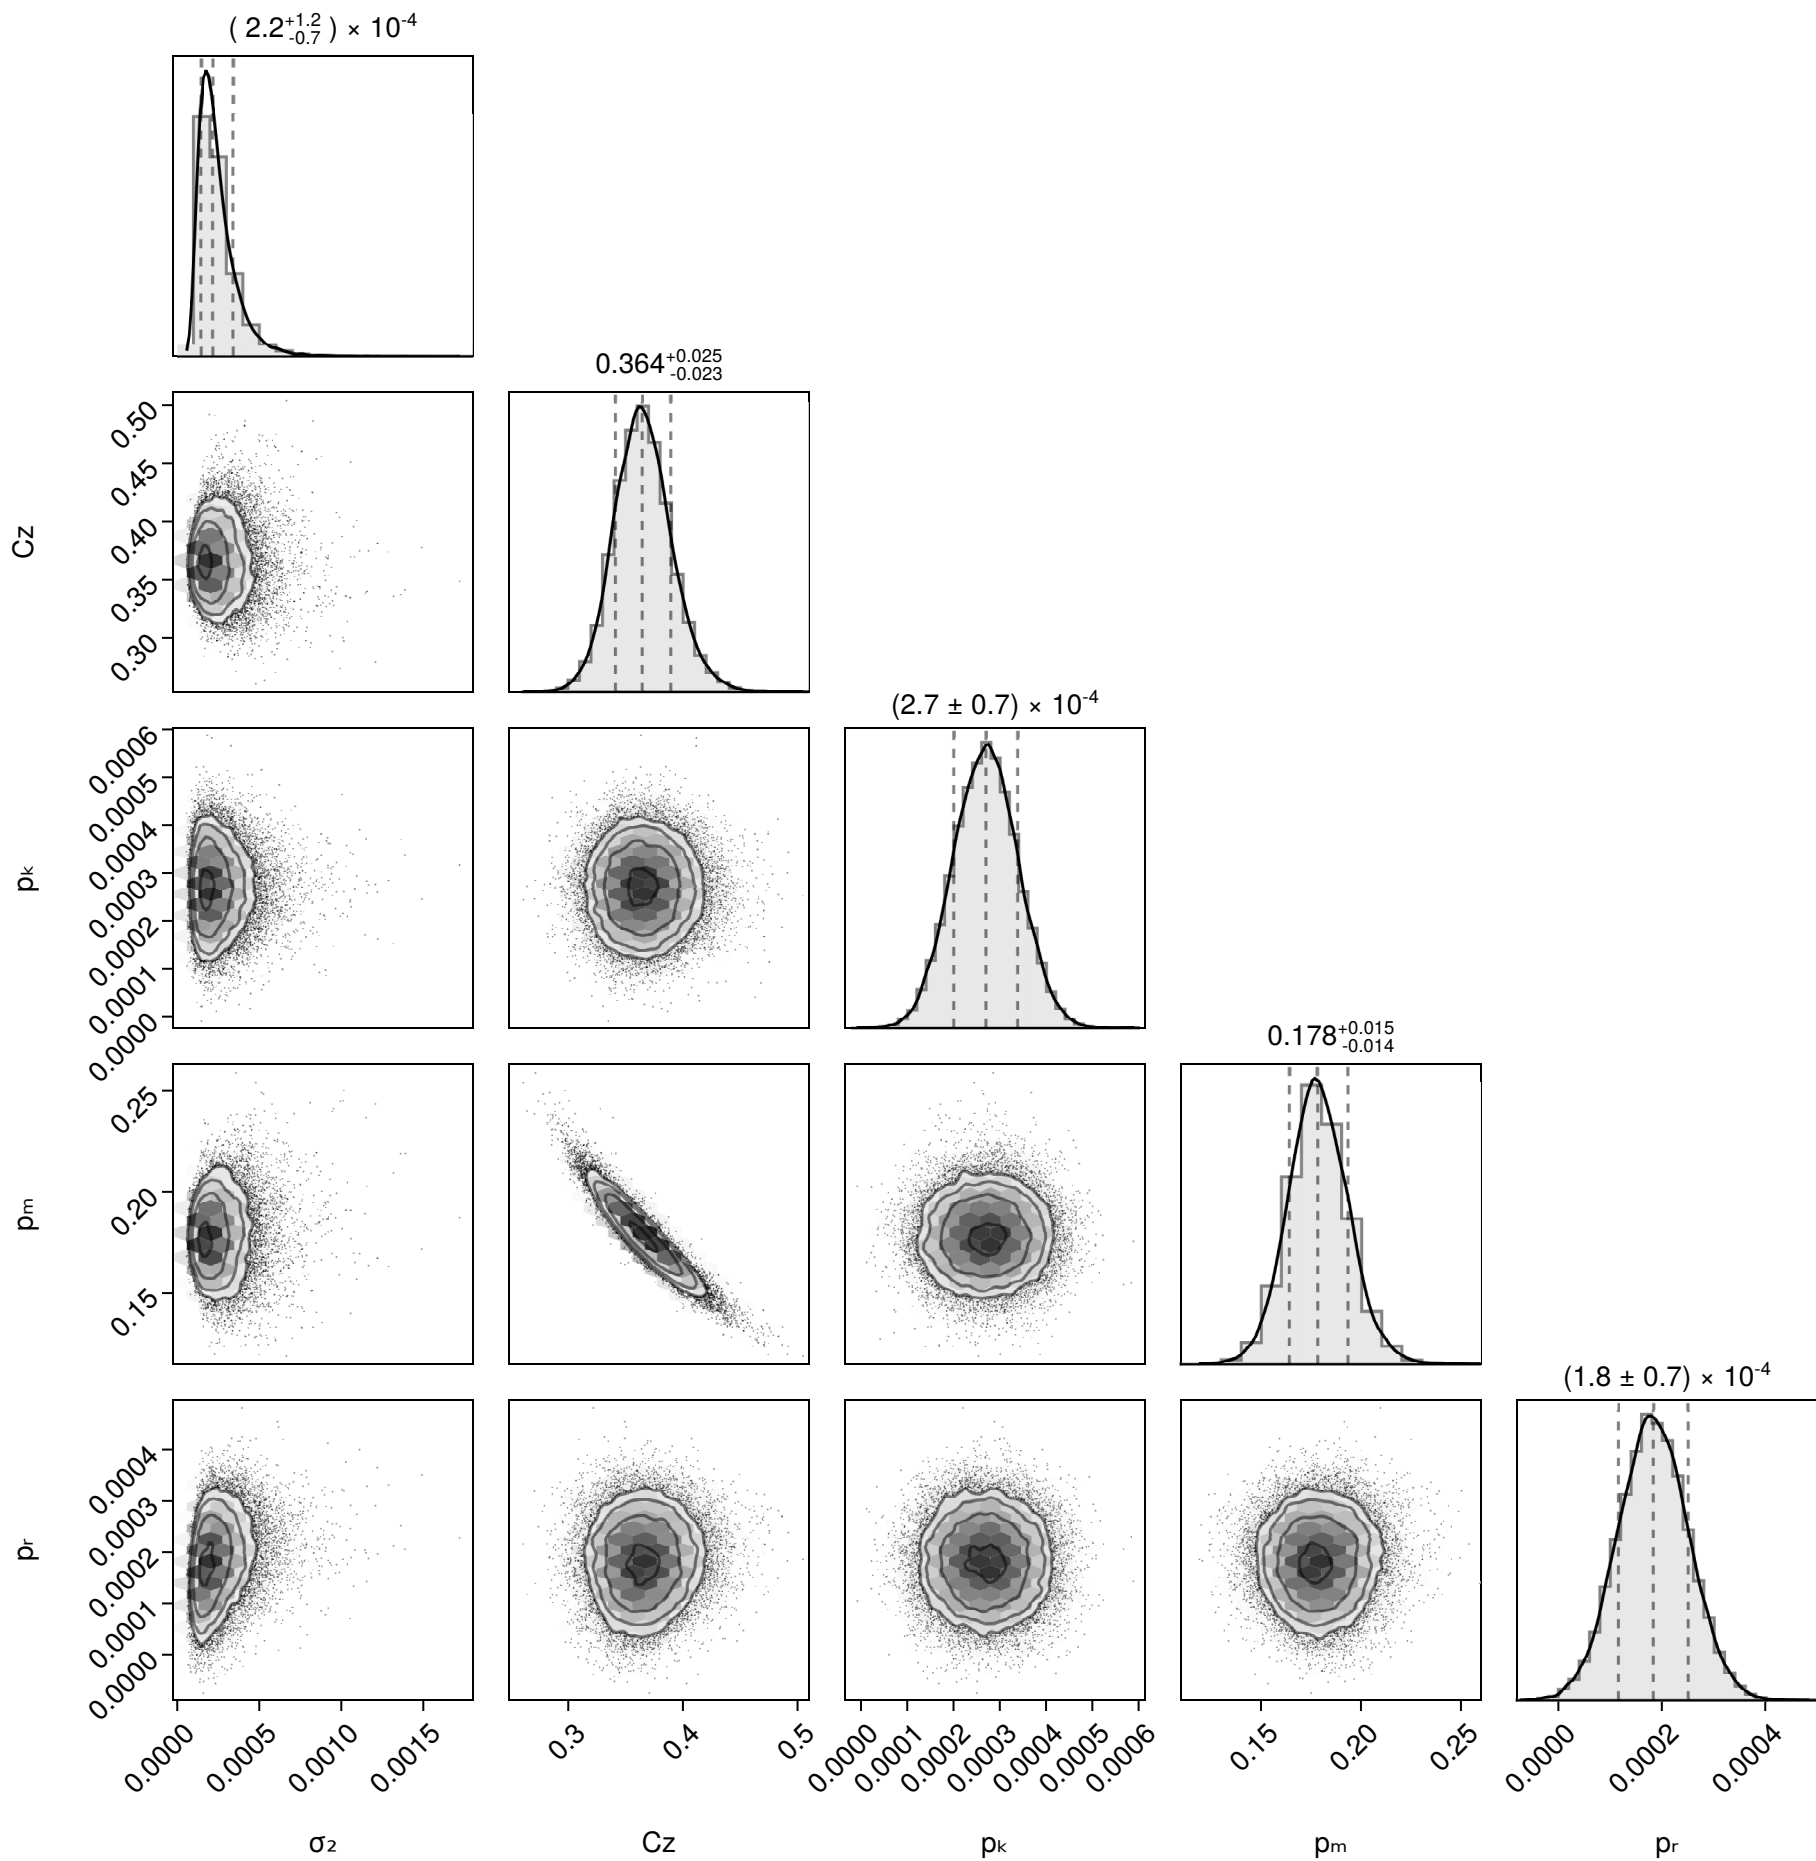

Supplement: Supplementary file 6 [file SI_ppLCDM.pdf › SuppInfAmend2/SI_ppLCDM.pdf]

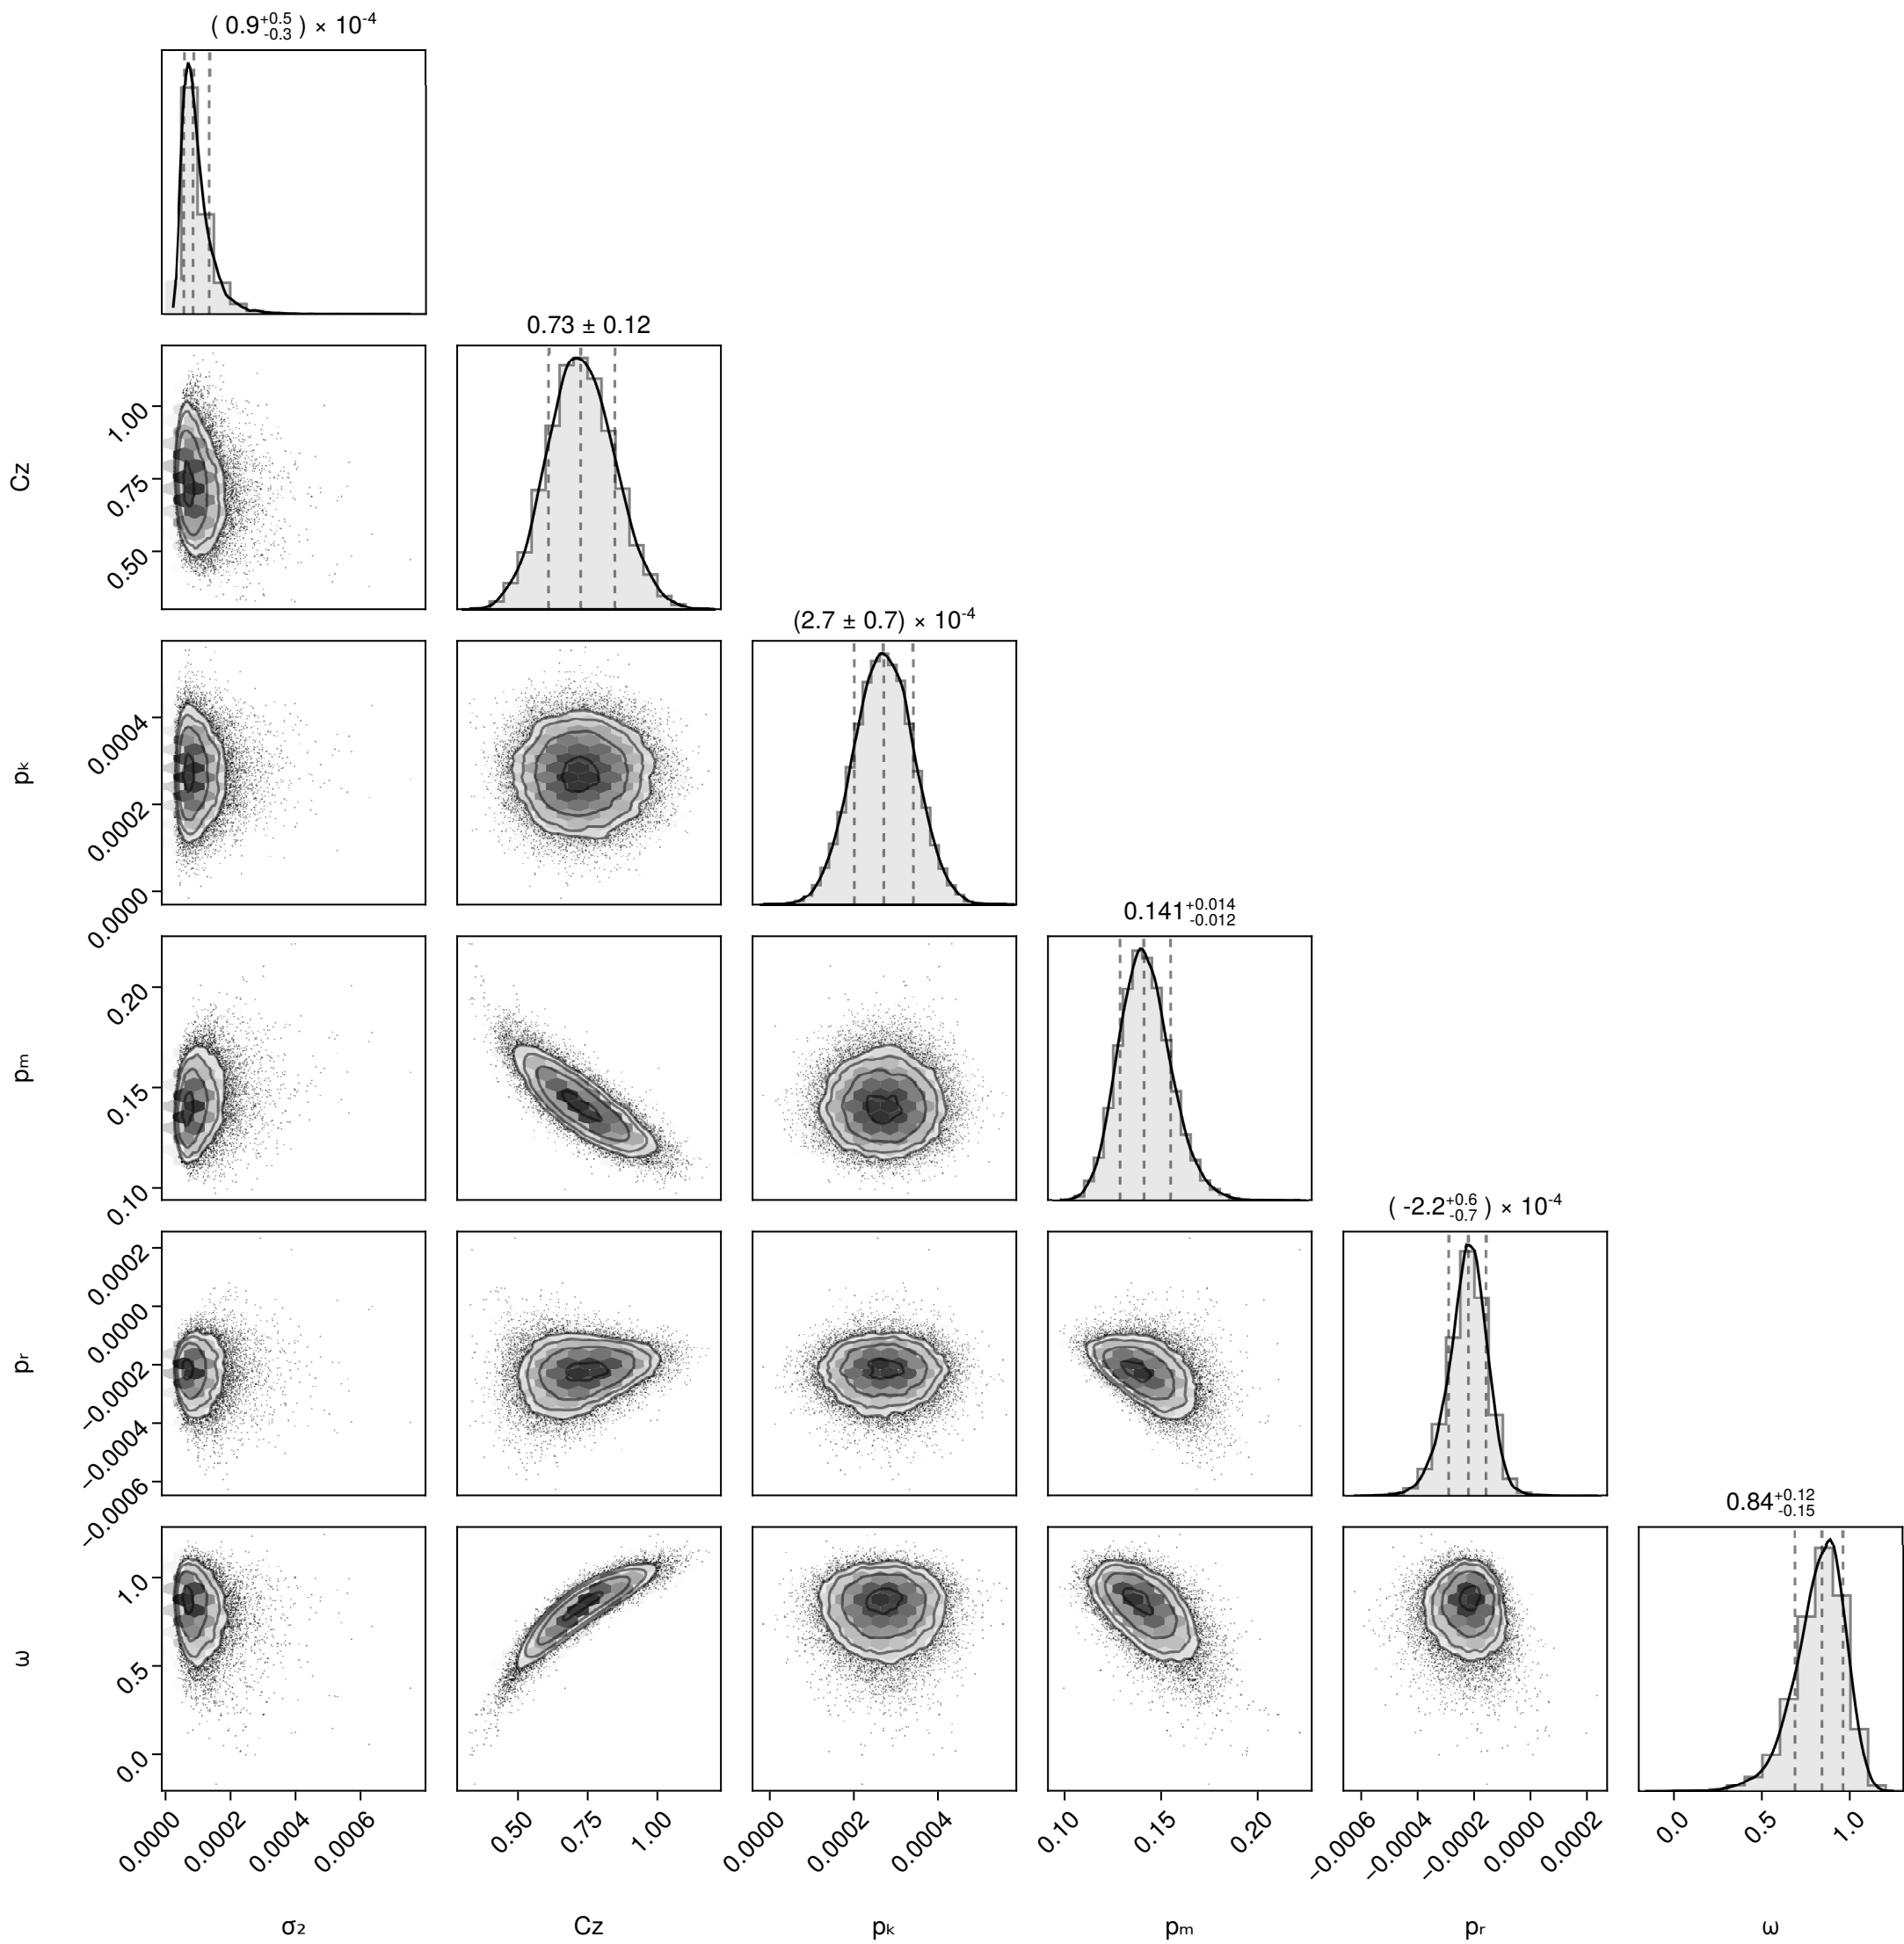

Supplement: Supplementary file 7 [file SI_ppwCDM.pdf › SuppInfAmend2/SI_ppwCDM.pdf]

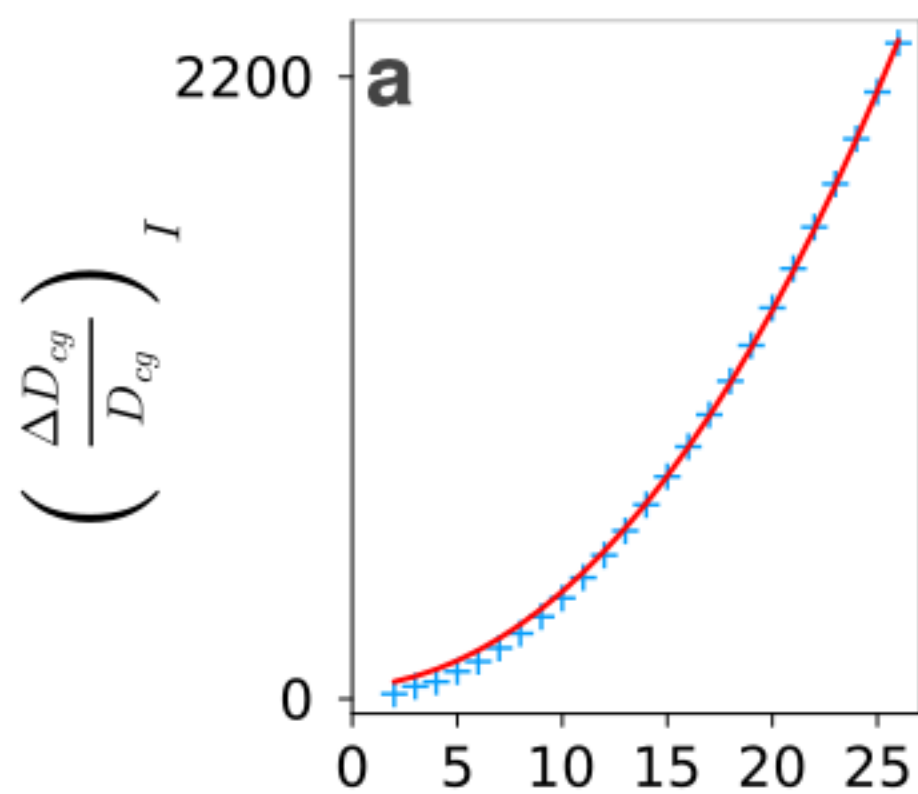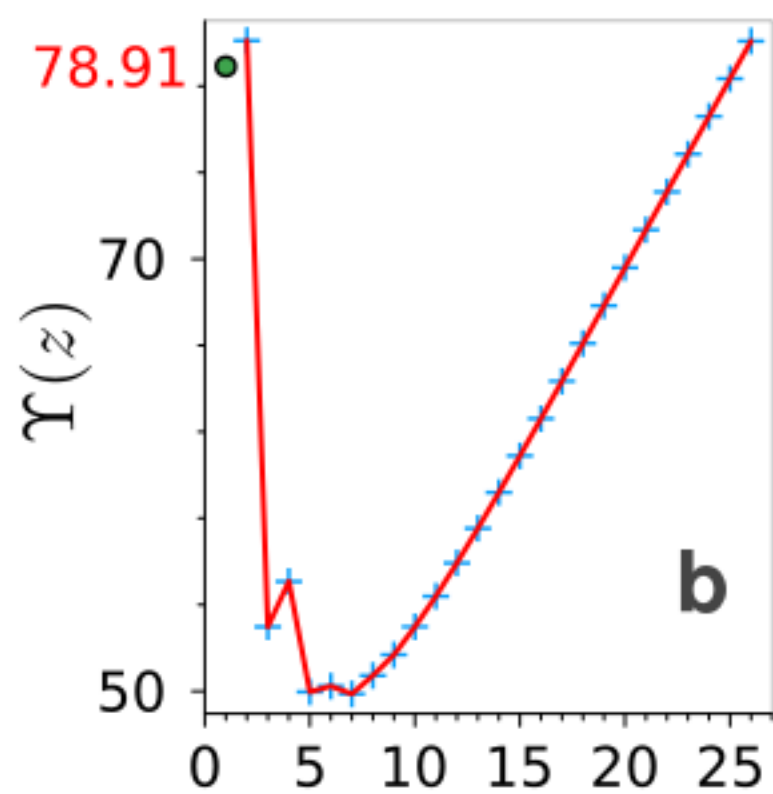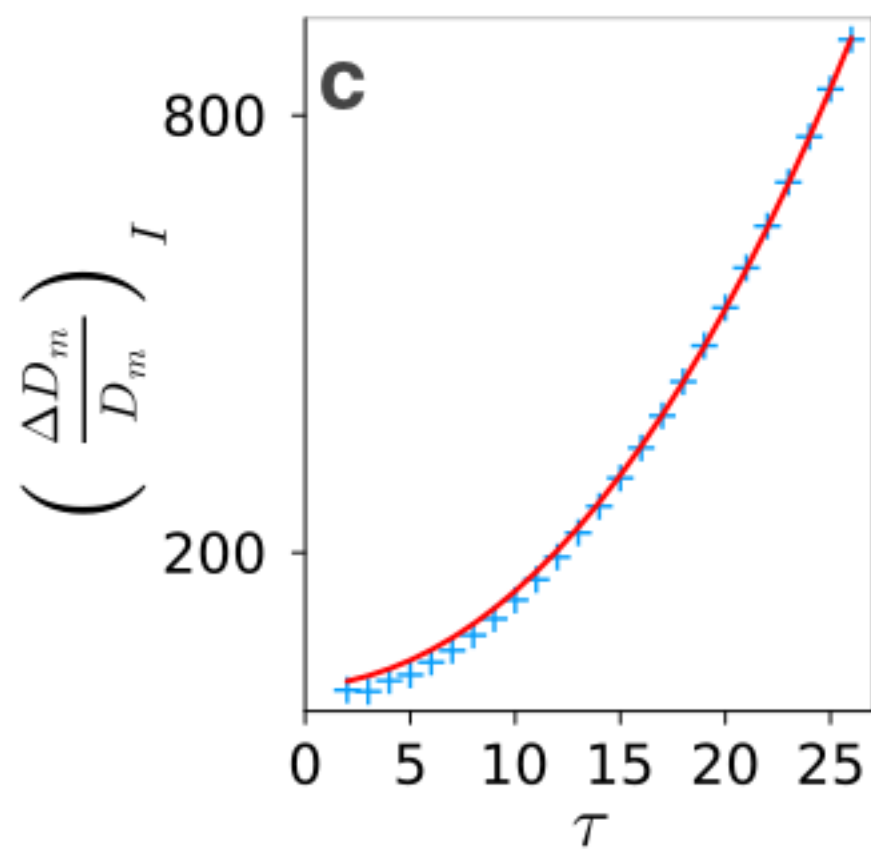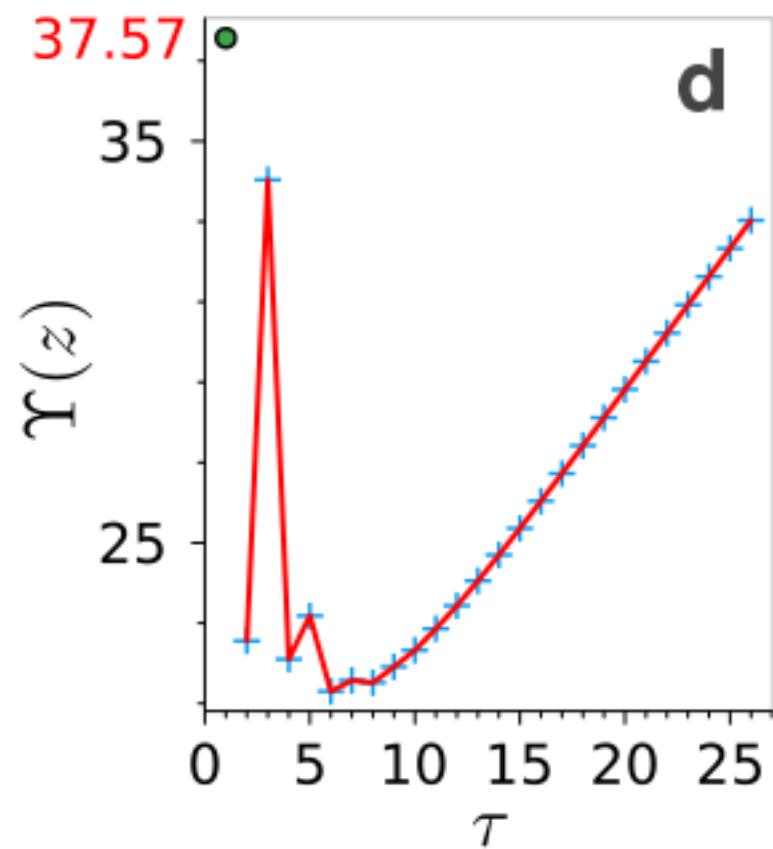

Supplement: Supplementary file 8 [file SIfig1.pdf › SuppInfAmend2/SIfig1.pdf]

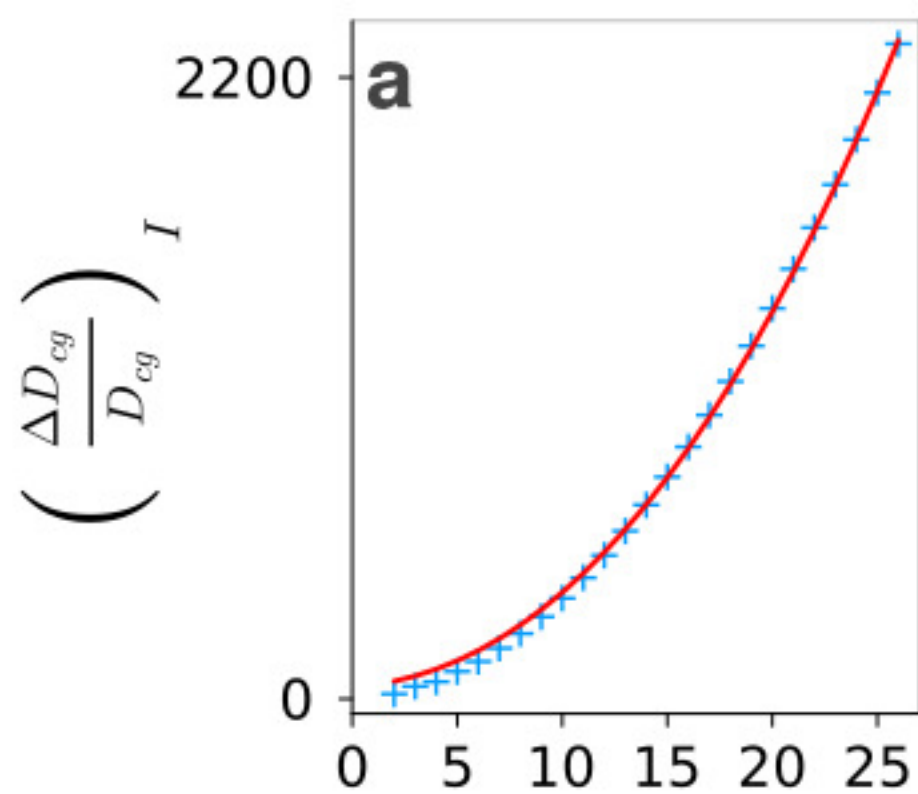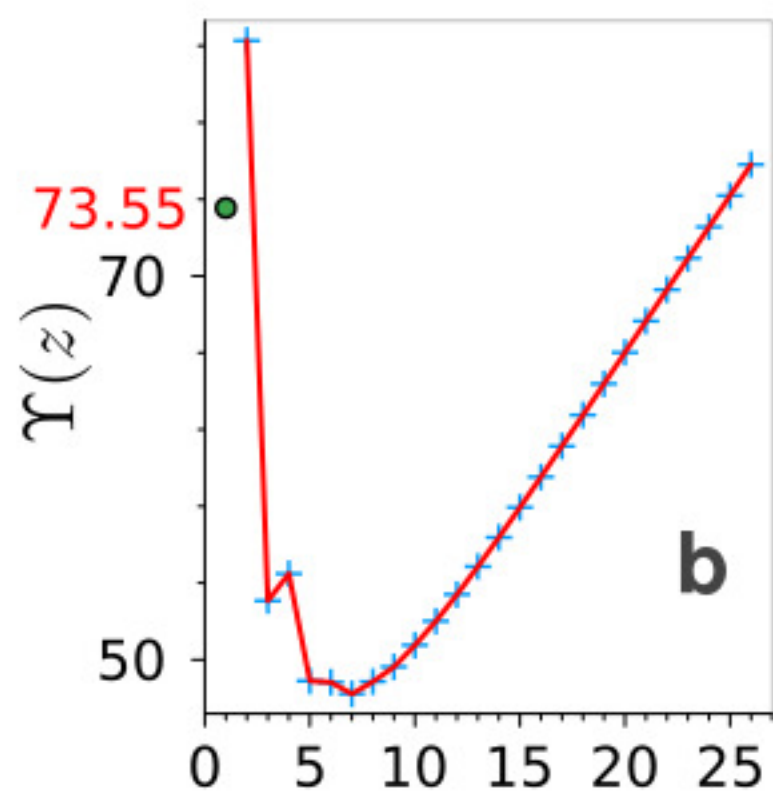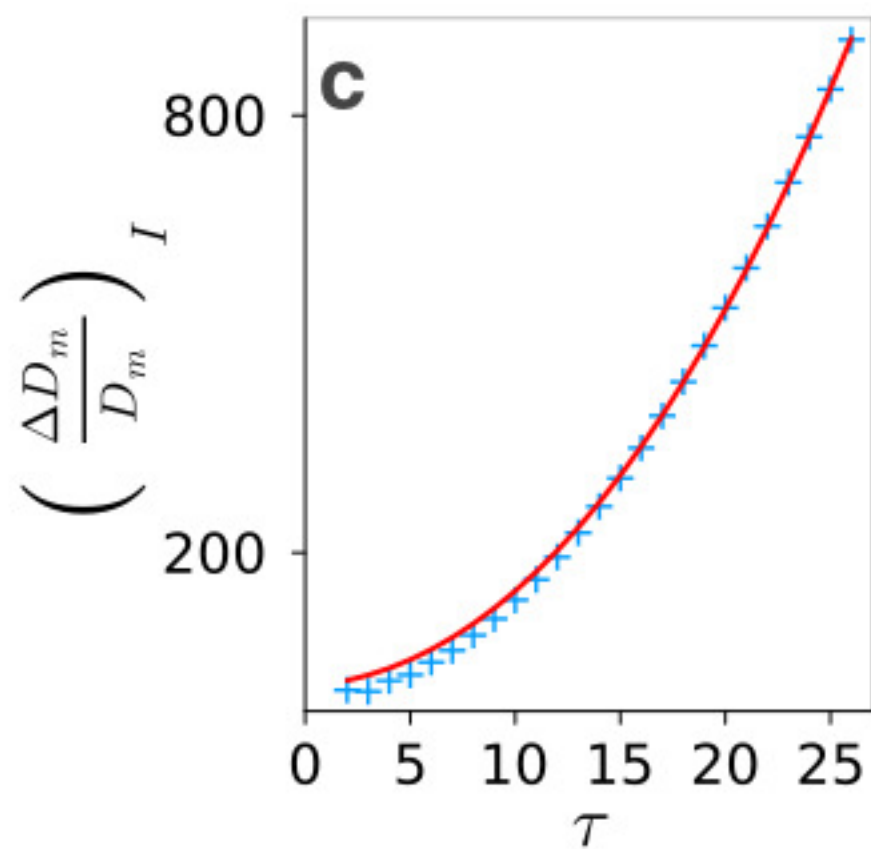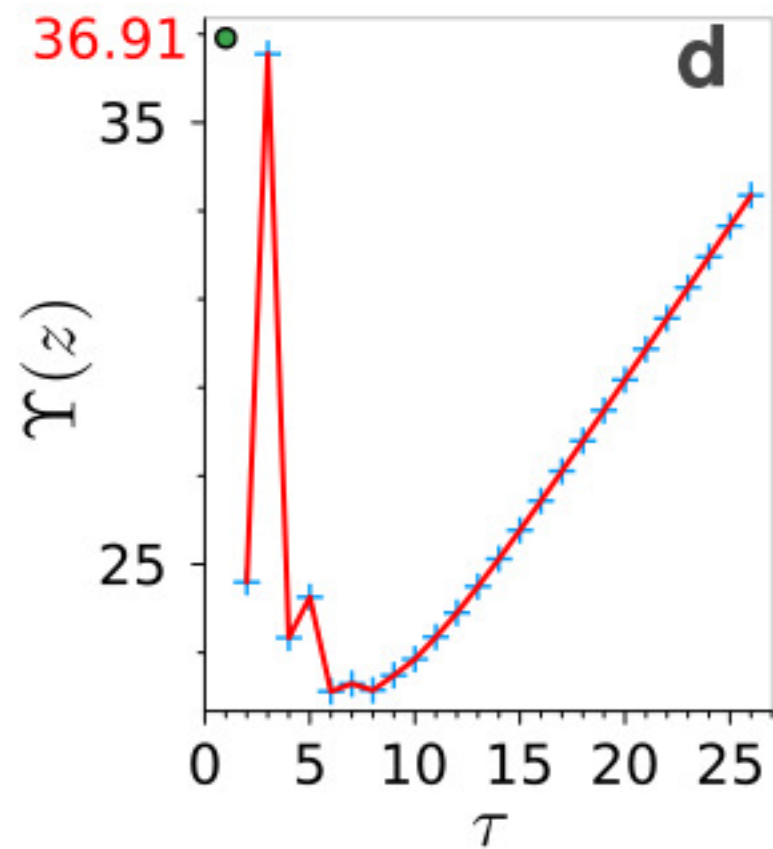

Supplement: Supplementary file 9 [file SIfig2.pdf › SuppInfAmend2/SIfig2.pdf]
